# Supplementary material for: A global re-analysis of regionally resolved emissions and atmospheric mole fractions of SF 6 for the period 2005–2021
Source: Copernicus journal article supplement (doi:10.5194/acp-24-12465-2024), 2024-11-11
Supplement: Supplementary file 1 [file acp-24-12465-2024-supplement.pdf]

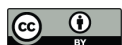

*Supplement of*

## **A global re-analysis of regionally resolved emissions and atmospheric mole fractions of SF<sub>6</sub> for the period 2005–2021**

**Martin Vojta et al.**

*Correspondence to:* Martin Vojta ([martin.vojta@univie.ac.at](mailto:martin.vojta@univie.ac.at))

The copyright of individual parts of the supplement might differ from the article licence.

## S1 Supplementary Figures

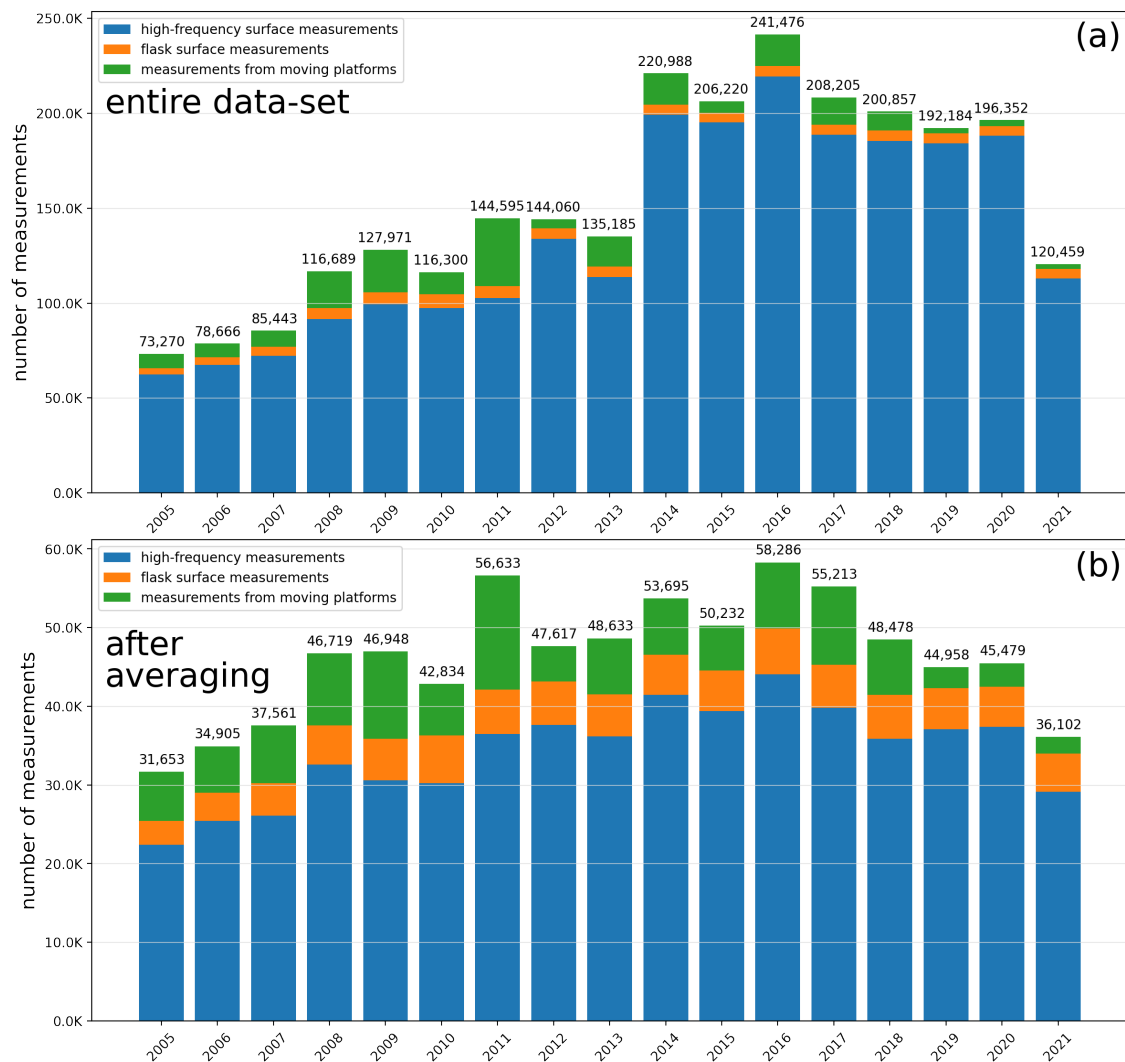

**Figure S1.** The total number of annual available observations of (a) the entire measurement dataset and (b) the dataset after averaging. The different colors indicate the different measurement types; blue: continuous, high-frequency surface measurements; orange: flask surface measurements; green: measurements from moving platforms.

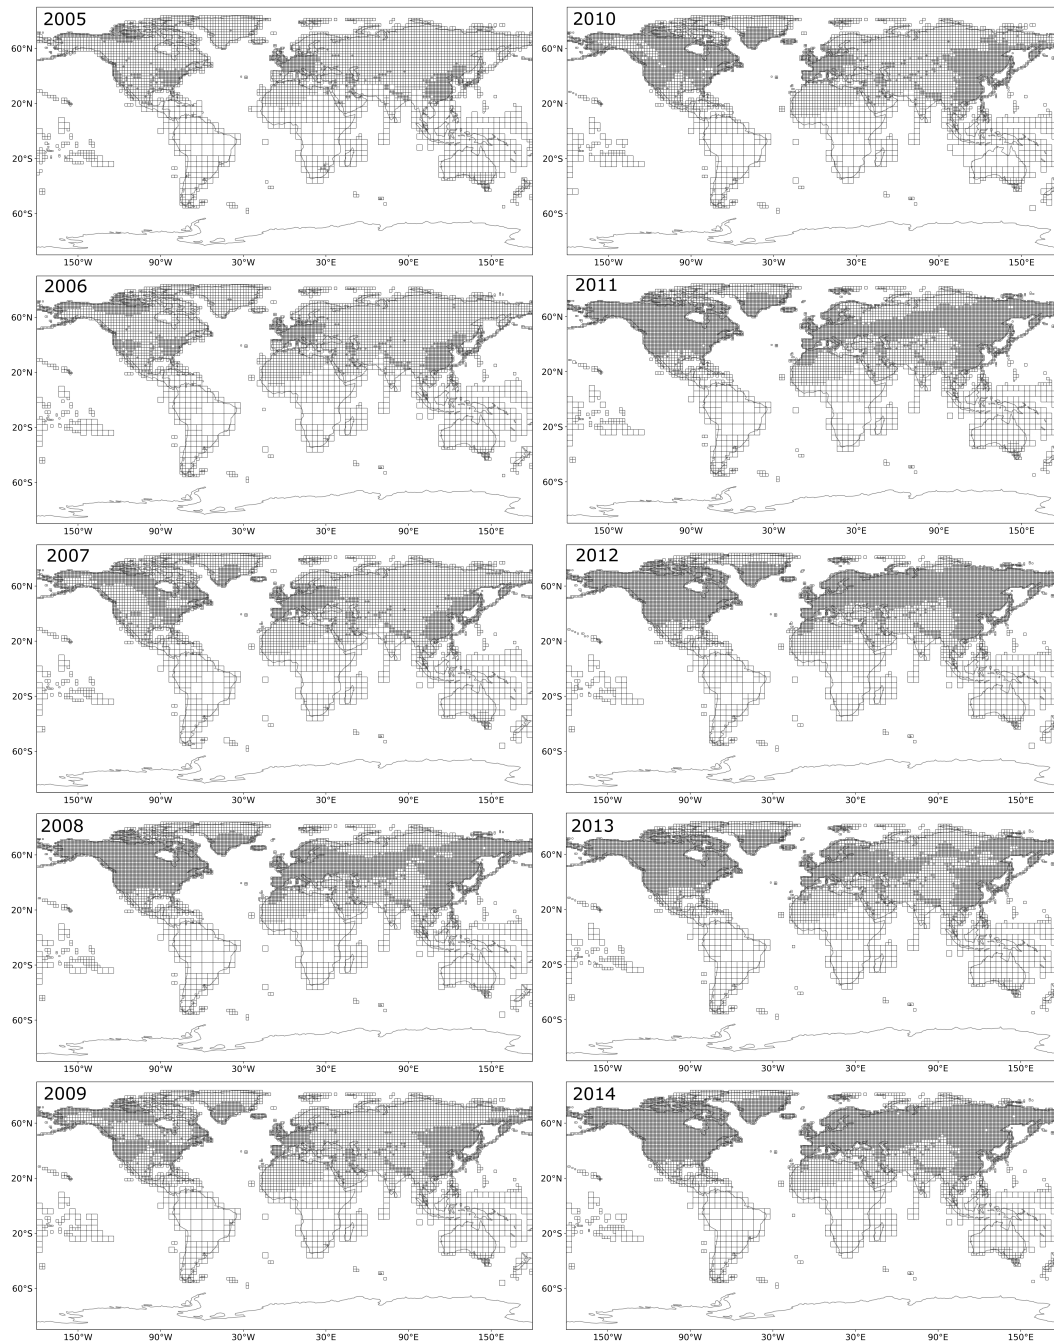

**Figure S2.** Global inversion grids for the years 2005 - 2014

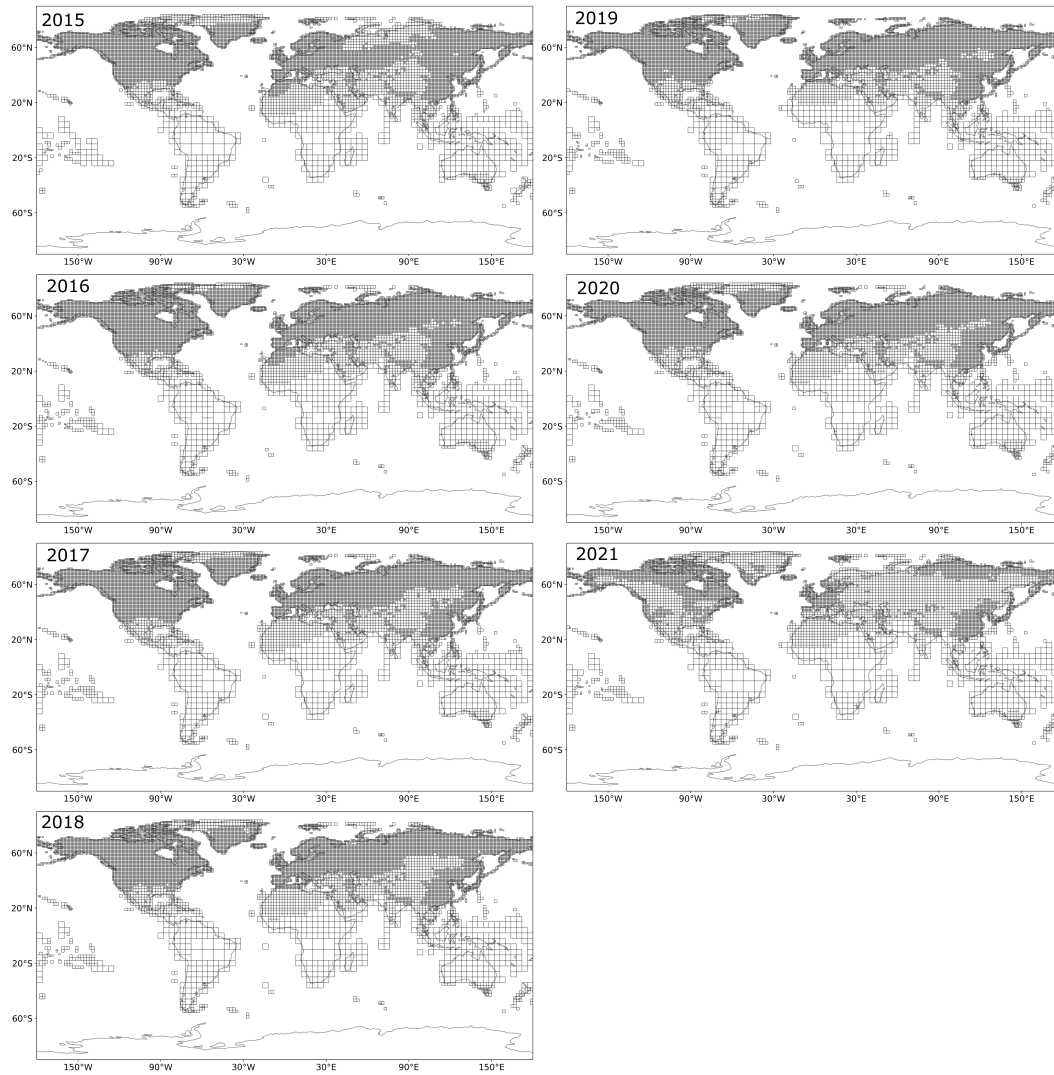

**Figure S3.** Global inversion grids for the years 2015 - 2021

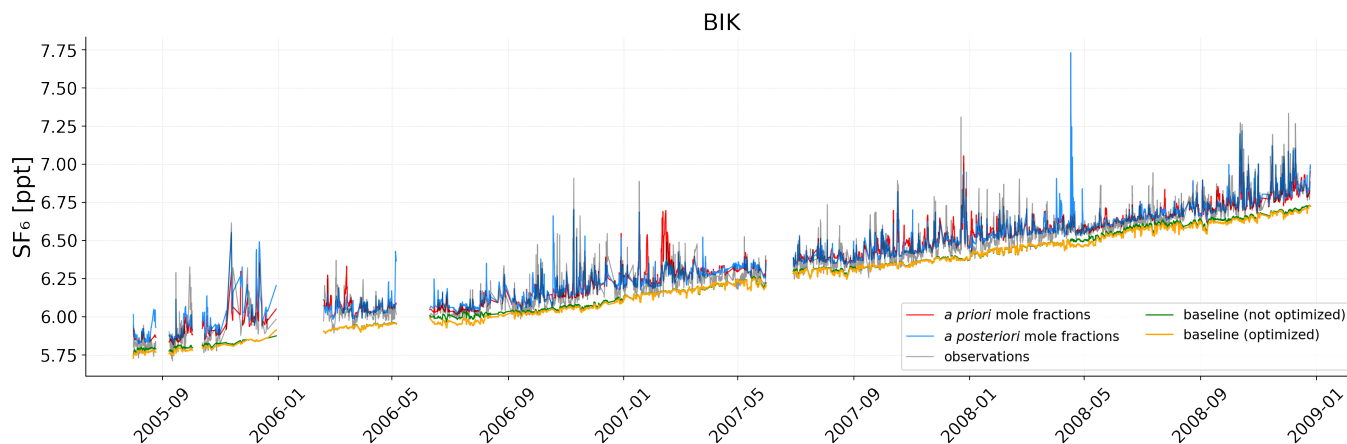

**Figure S4.** Mole fraction time series at the Bialystok (Poland) measurement station. Red lines illustrate the modeled *a priori* mole fractions calculated with the E7P *a priori* emissions and blue lines represent the modeled *a posteriori* mole fractions. The green line illustrates the baseline derived by the GDB method and the orange line shows the optimized baseline. The grey line represents the observed mole fractions.

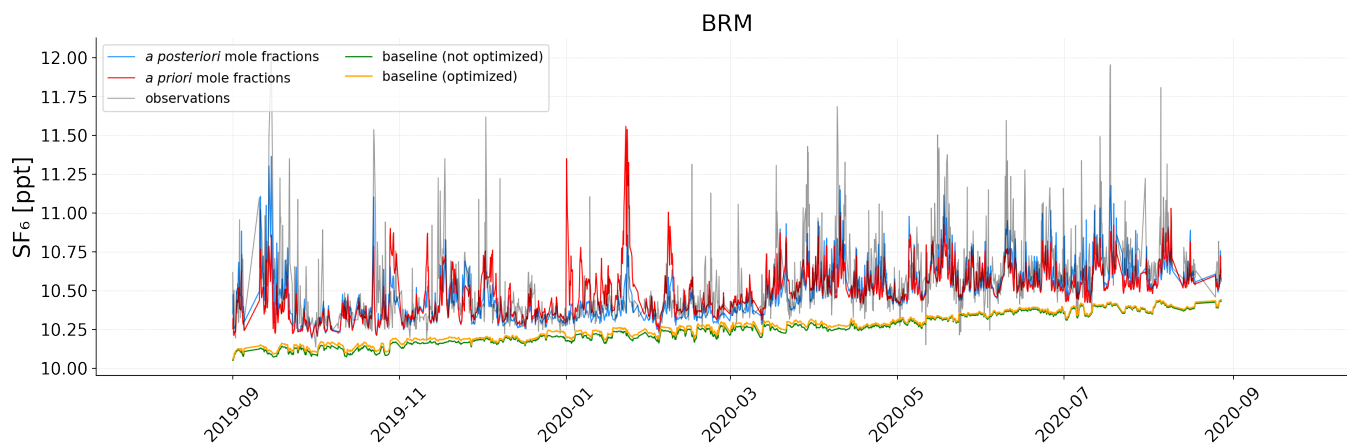

**Figure S5.** Mole fraction time series at the Beromünster (Switzerland) measurement station. Red lines illustrate the modeled *a priori* mole fractions calculated with the E7P *a priori* emissions and blue lines represent the modeled *a posteriori* mole fractions. The green line illustrates the baseline derived by the GDB method and the orange line shows the optimized baseline. The grey line represents the observed mole fractions.

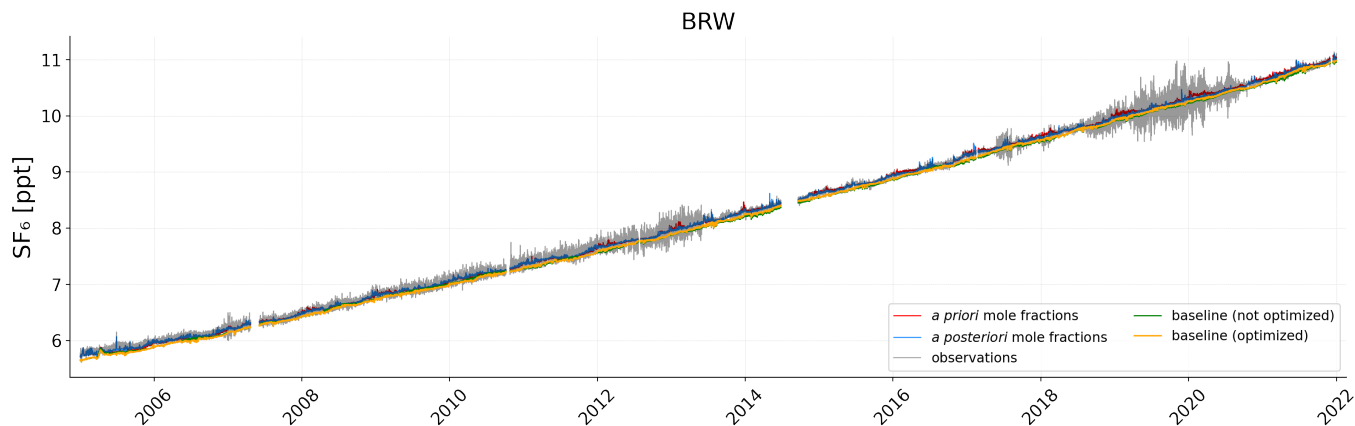

**Figure S6.** Mole fraction time series at the Barrow (Alaska) measurement station. Red lines illustrate the modeled *a priori* mole fractions calculated with the E7P *a priori* emissions and blue lines represent the modeled *a posteriori* mole fractions. The green line illustrates the baseline derived by the GDB method and the orange line shows the optimized baseline. The grey line represents the observed mole fractions.

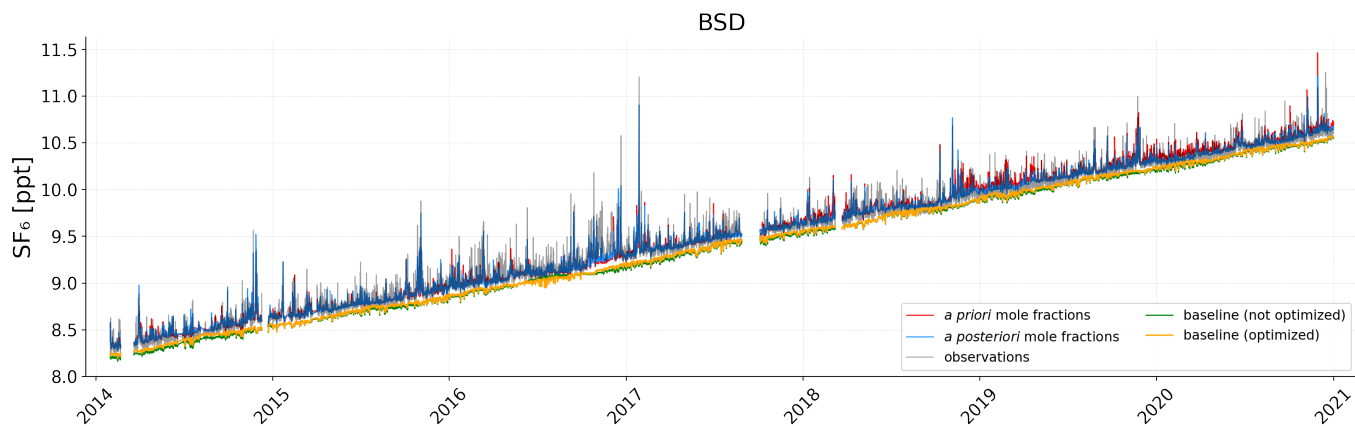

**Figure S7.** (a) represents the Mole fraction time series at the Bilsdale (UK) measurement station. Red lines illustrate the modeled *a priori* mole fractions calculated with the E7P *a priori* emissions and blue lines represent the modeled *a posteriori* mole fractions. The green line illustrates the baseline derived by the GDB method and the orange line shows the optimized baseline. The grey line represents the observed mole fractions.

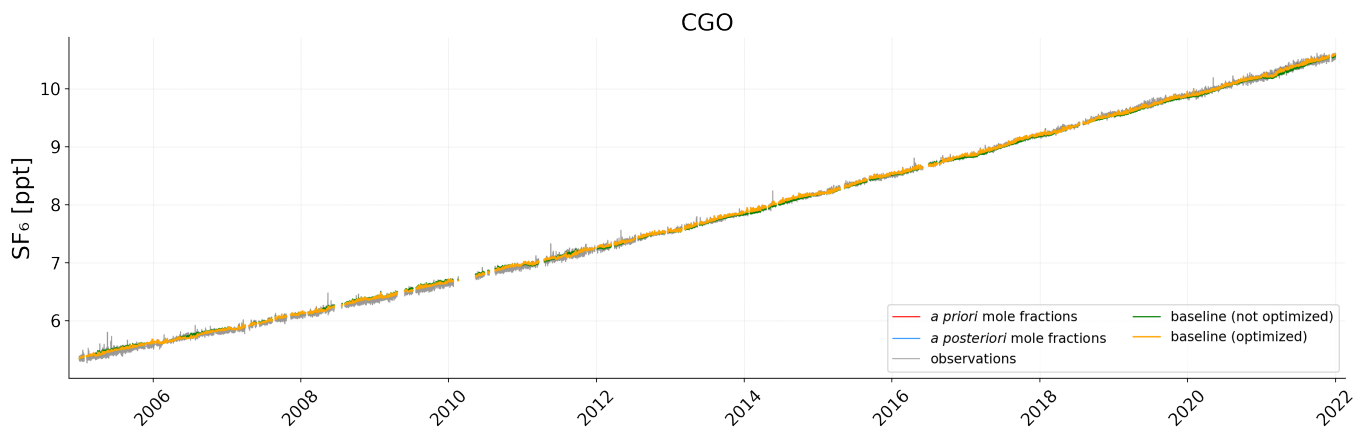

**Figure S8.** Mole fraction time series at the Cape Grim (Tasmania) measurement station. Red lines illustrate the modeled *a priori* mole fractions calculated with the E7P *a priori* emissions and blue lines represent the modeled *a posteriori* mole fractions. The green line illustrates the baseline derived by the GDB method and the orange line shows the optimized baseline. The grey line represents the observed mole fractions.

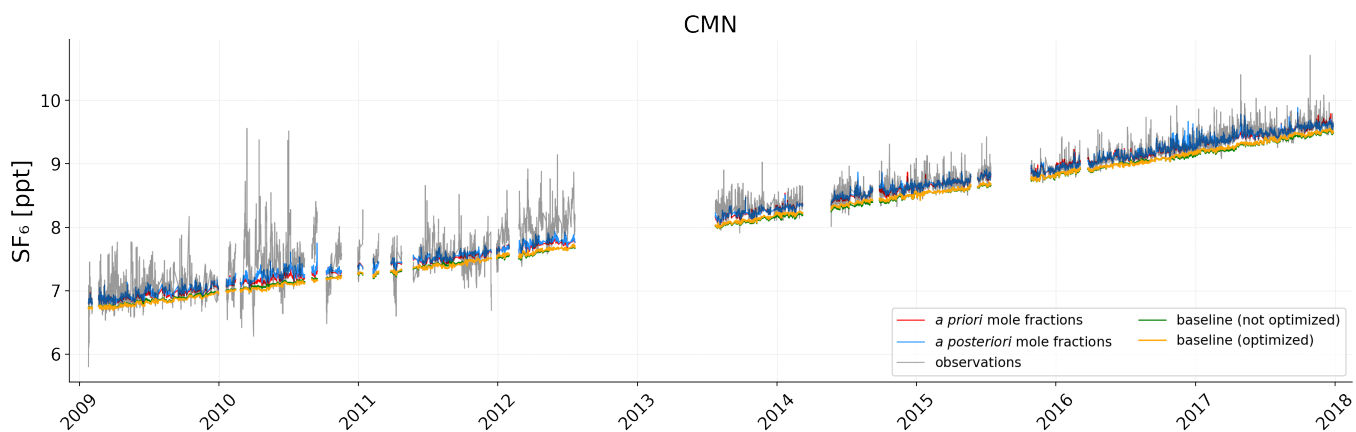

**Figure S9.** Mole fraction time series at the Monte Cimone (Italy) measurement station. Red lines illustrate the modeled *a priori* mole fractions calculated with the E7P *a priori* emissions and blue lines represent the modeled *a posteriori* mole fractions. The green line illustrates the baseline derived by the GDB method and the orange line shows the optimized baseline. The grey line represents the observed mole fractions.

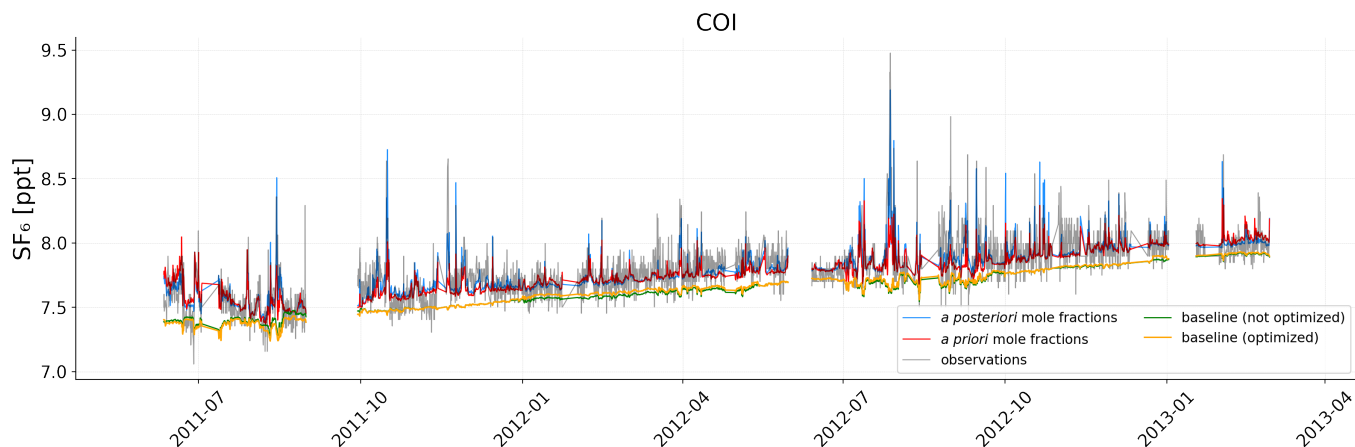

**Figure S10.** Mole fraction time series at the Cape Ochiishi (Japan) measurement station. Red lines illustrate the modeled *a priori* mole fractions calculated with the E7P *a priori* emissions and blue lines represent the modeled *a posteriori* mole fractions. The green line illustrates the baseline derived by the GDB method and the orange line shows the optimized baseline. The grey line represents the observed mole fractions.

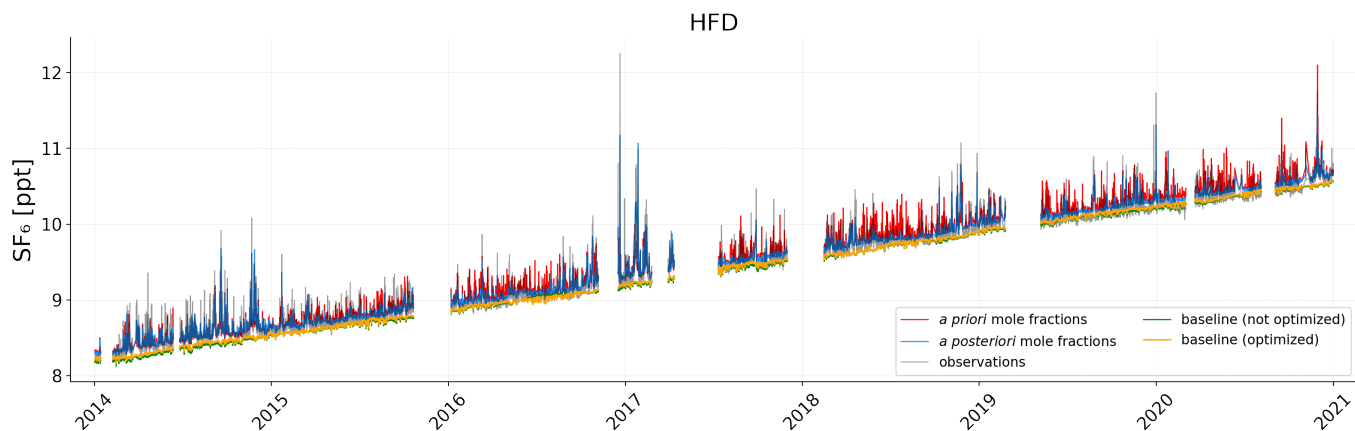

**Figure S11.** Mole fraction time series at the Heathfield (UK) measurement station. Red lines illustrate the modeled *a priori* mole fractions calculated with the E7P *a priori* emissions and blue lines represent the modeled *a posteriori* mole fractions. The green line illustrates the baseline derived by the GDB method and the orange line shows the optimized baseline. The grey line represents the observed mole fractions.



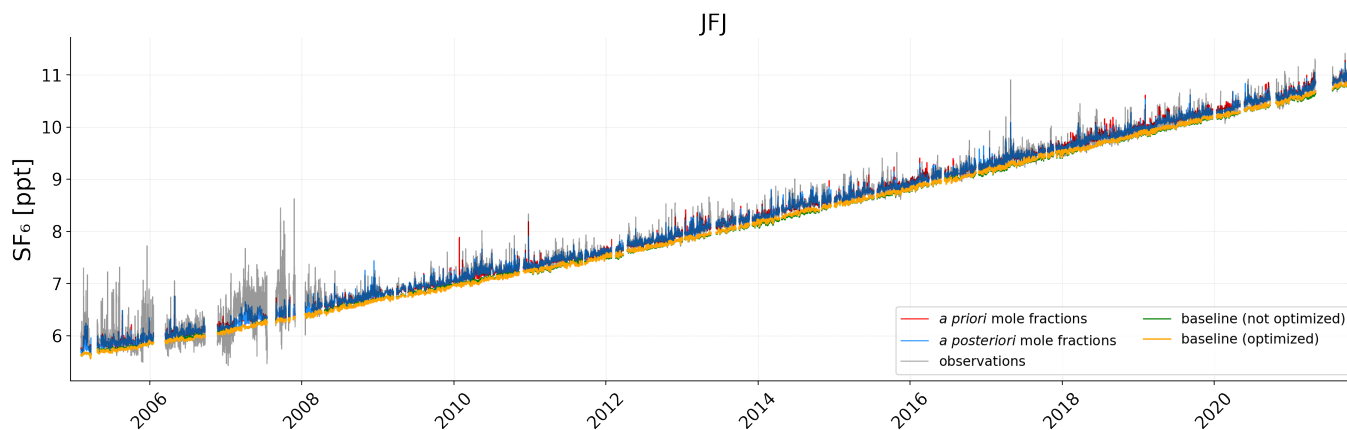

**Figure S12.** Mole fraction time series at the Jungfraujoch (Switzerland) measurement station. Red lines illustrate the modeled *a priori* mole fractions calculated with the E7P *a priori* emissions and blue lines represent the modeled *a posteriori* mole fractions. The green line illustrates the baseline derived by the GDB method and the orange line shows the optimized baseline. The grey line represents the observed mole fractions.

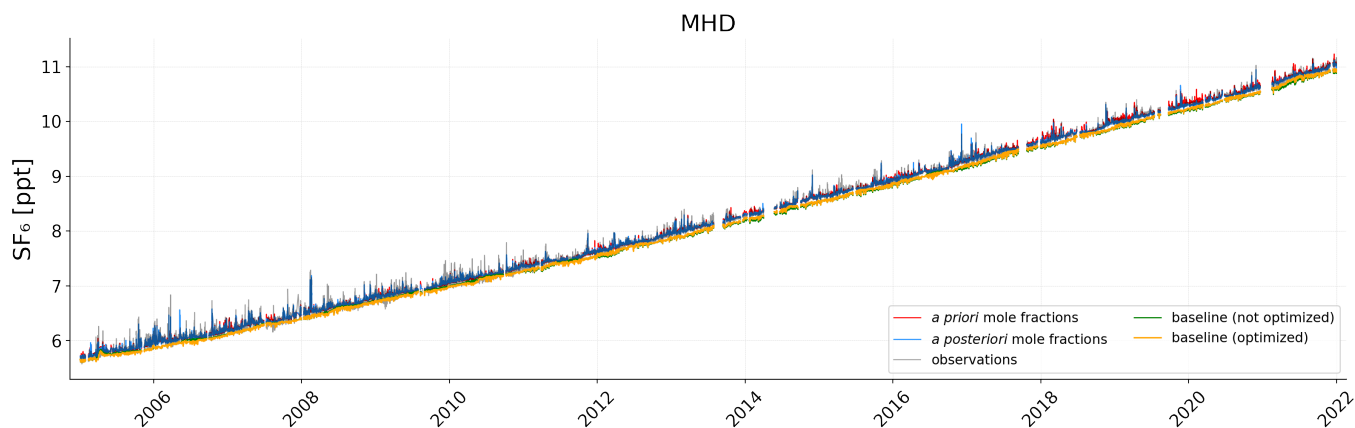

**Figure S13.** Mole fraction time series at the Mace Head (Ireland) measurement station. Red lines illustrate the modeled *a priori* mole fractions calculated with the E7P *a priori* emissions and blue lines represent the modeled *a posteriori* mole fractions. The green line illustrates the baseline derived by the GDB method and the orange line shows the optimized baseline. The grey line represents the observed mole fractions.

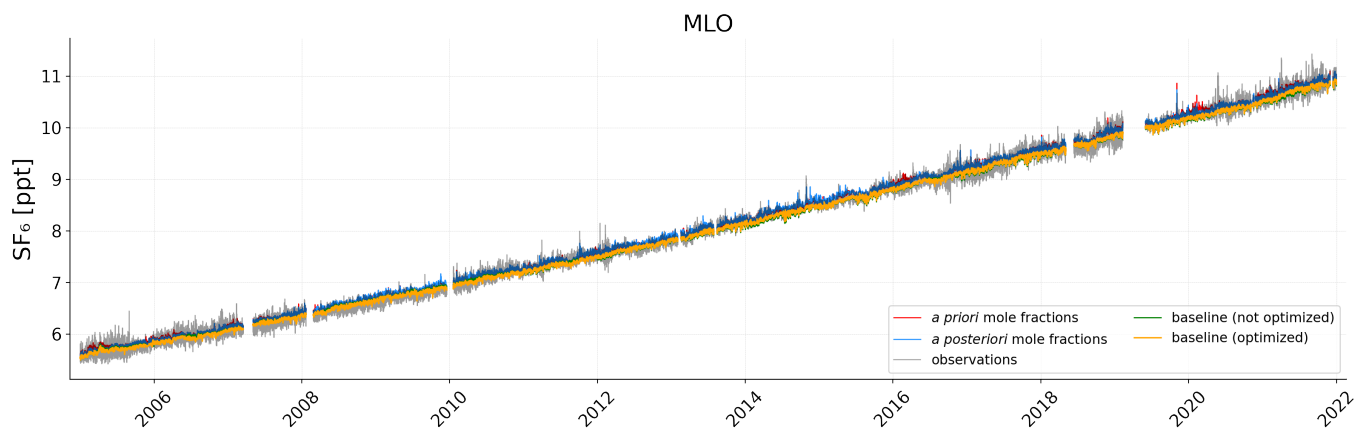

**Figure S14.** Mole fraction time series at the Mauna Loa (Hawaii) measurement station. Red lines illustrate the modeled *a priori* mole fractions calculated with the E7P *a priori* emissions and blue lines represent the modeled *a posteriori* mole fractions. The green line illustrates the baseline derived by the GDB method and the orange line shows the optimized baseline. The grey line represents the observed mole fractions.

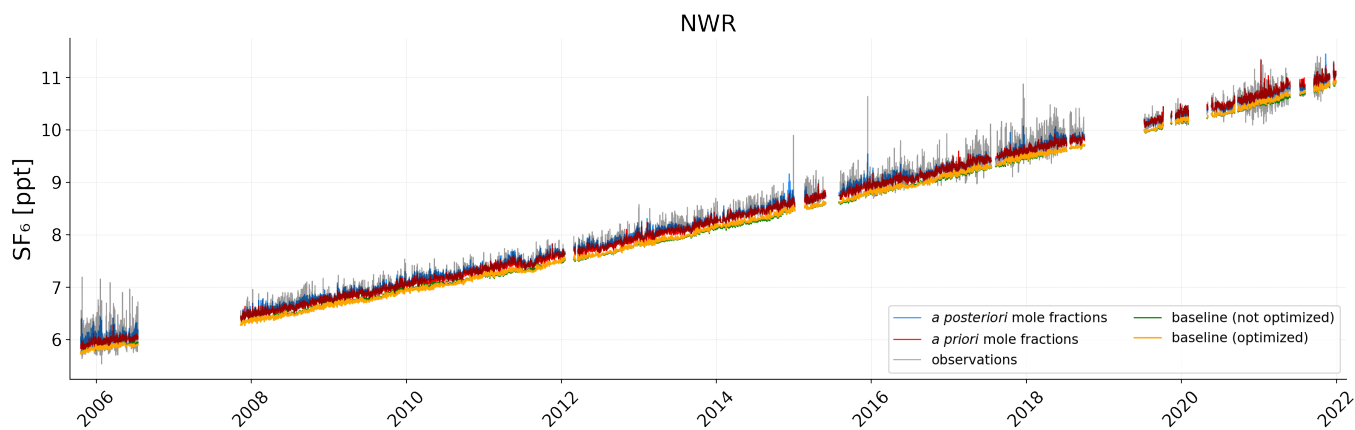

**Figure S15.** Mole fraction time series at the Niwot Ridge (Colorado) measurement station. Red lines illustrate the modeled *a priori* mole fractions calculated with the E7P *a priori* emissions and blue lines represent the modeled *a posteriori* mole fractions. The green line illustrates the baseline derived by the GDB method and the orange line shows the optimized baseline. The grey line represents the observed mole fractions.

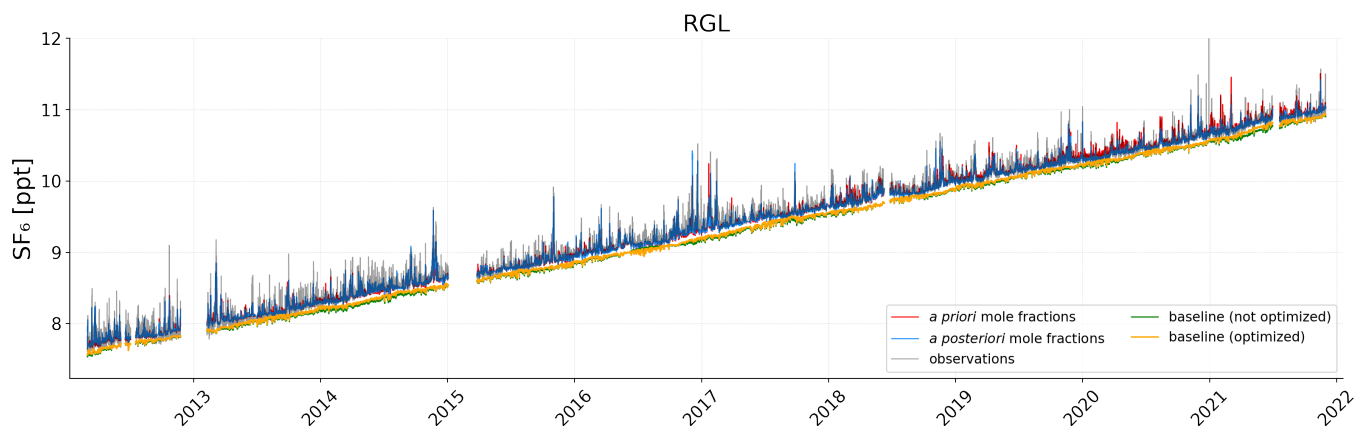

**Figure S16.** Mole fraction time series at the Ridge Hill (UK) measurement station. Red lines illustrate the modeled *a priori* mole fractions calculated with the E7P *a priori* emissions and blue lines represent the modeled *a posteriori* mole fractions. The green line illustrates the baseline derived by the GDB method and the orange line shows the optimized baseline. The grey line represents the observed mole fractions.

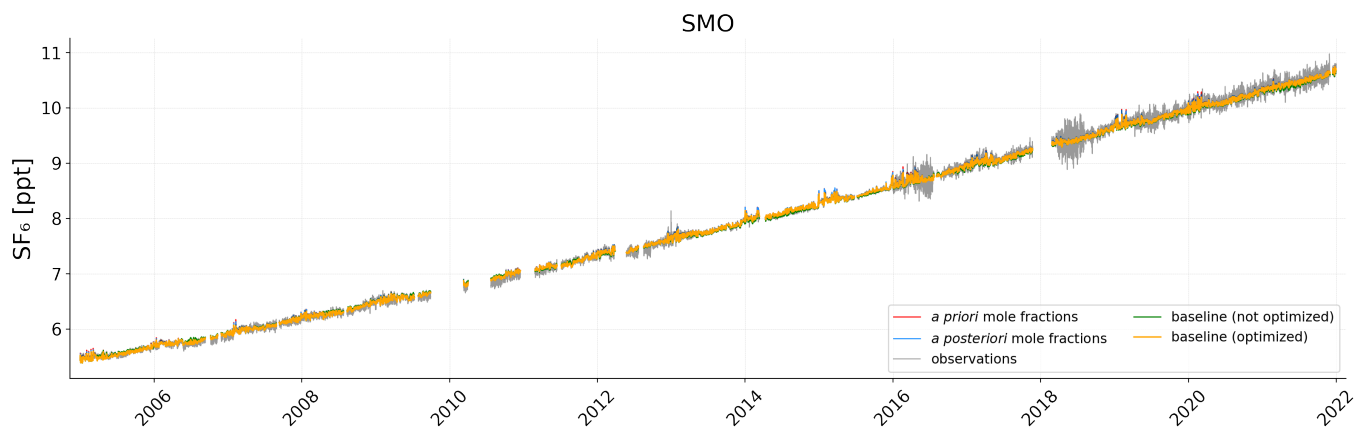

**Figure S17.** Mole fraction time series at the Cape Matatula (American Samoa) measurement station. Red lines illustrate the modeled *a priori* mole fractions calculated with the E7P *a priori* emissions and blue lines represent the modeled *a posteriori* mole fractions. The green line illustrates the baseline derived by the GDB method and the orange line shows the optimized baseline. The grey line represents the observed mole fractions.

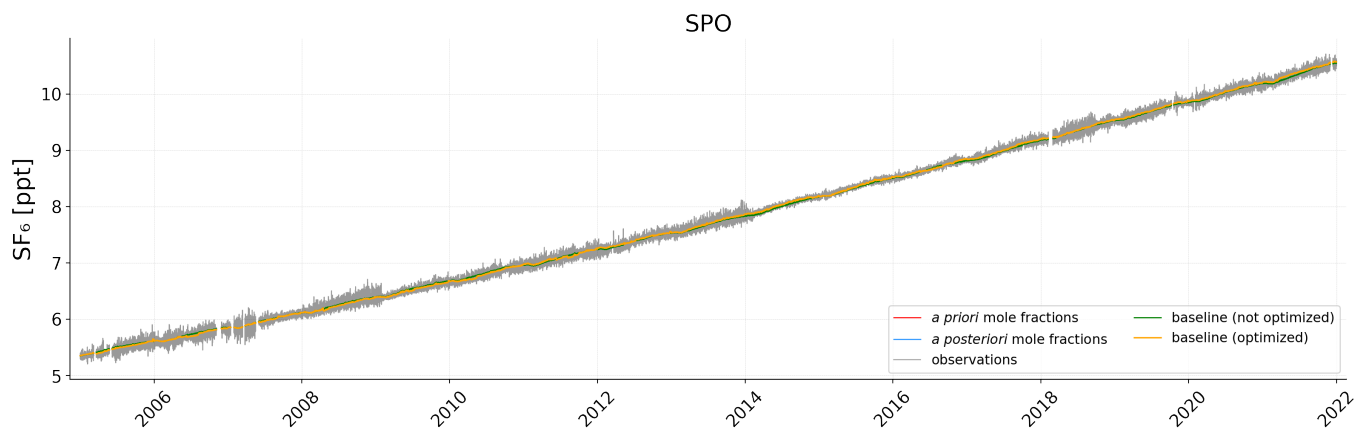

**Figure S18.** Mole fraction time series at the South Pole, (Antarctica) measurement station. Red lines illustrate the modeled *a priori* mole fractions calculated with the E7P *a priori* emissions and blue lines represent the modeled *a posteriori* mole fractions. The green line illustrates the baseline derived by the GDB method and the orange line shows the optimized baseline. The grey line represents the observed mole fractions.

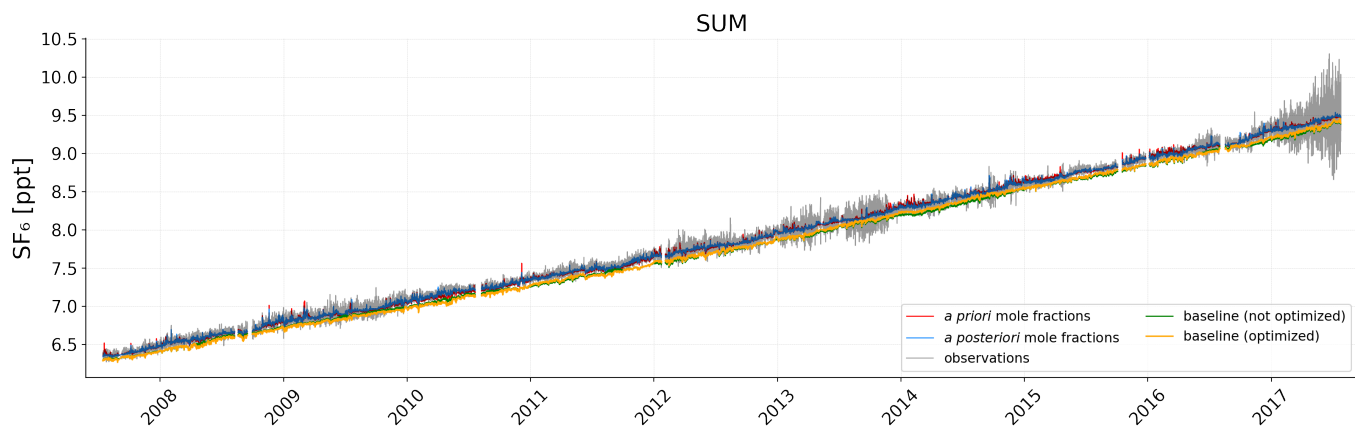

**Figure S19.** Mole fraction time series at the Summit (Greenland) measurement station. Red lines illustrate the modeled *a priori* mole fractions calculated with the E7P *a priori* emissions and blue lines represent the modeled *a posteriori* mole fractions. The green line illustrates the baseline derived by the GDB method and the orange line shows the optimized baseline. The grey line represents the observed mole fractions.

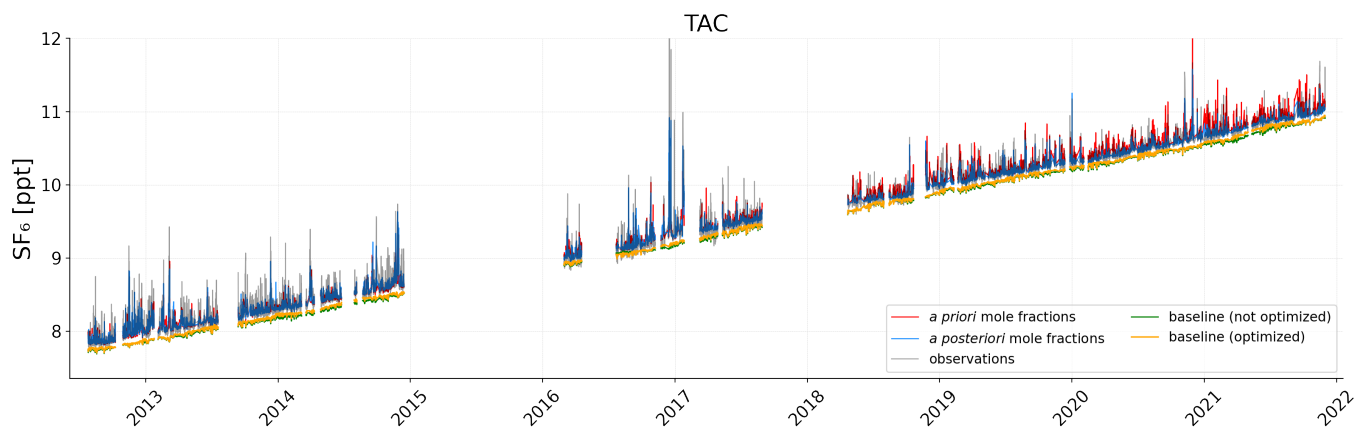

**Figure S20.** Mole fraction time series at the Tacolneston Tall Tower (UK) measurement station. Red lines illustrate the modeled *a priori* mole fractions calculated with the E7P *a priori* emissions and blue lines represent the modeled *a posteriori* mole fractions. The green line illustrates the baseline derived by the GDB method and the orange line shows the optimized baseline. The grey line represents the observed mole fractions.

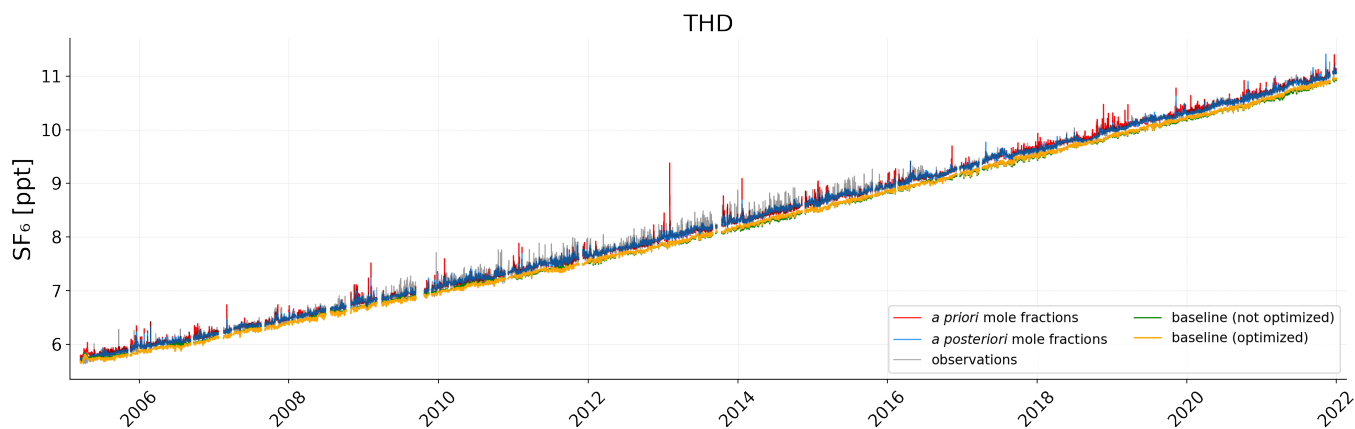

**Figure S21.** Mole fraction time series at the Trinidad Head (USA) measurement station. Red lines illustrate the modeled *a priori* mole fractions calculated with the E7P *a priori* emissions and blue lines represent the modeled *a posteriori* mole fractions. The green line illustrates the baseline derived by the GDB method and the orange line shows the optimized baseline. The grey line represents the observed mole fractions.

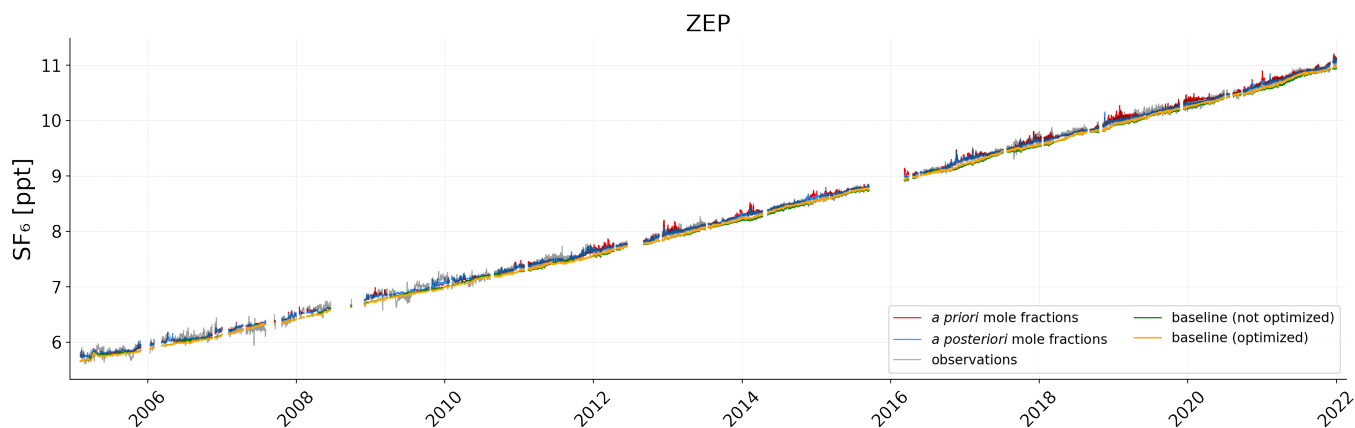

**Figure S22.** Mole fraction time series at the Zeppelin (Ny-Alesund, Norway) measurement station. Red lines illustrate the modeled *a priori* mole fractions calculated with the E7P *a priori* emissions and blue lines represent the modeled *a posteriori* mole fractions. The green line illustrates the baseline derived by the GDB method and the orange line shows the optimized baseline. The grey line represents the observed mole fractions.

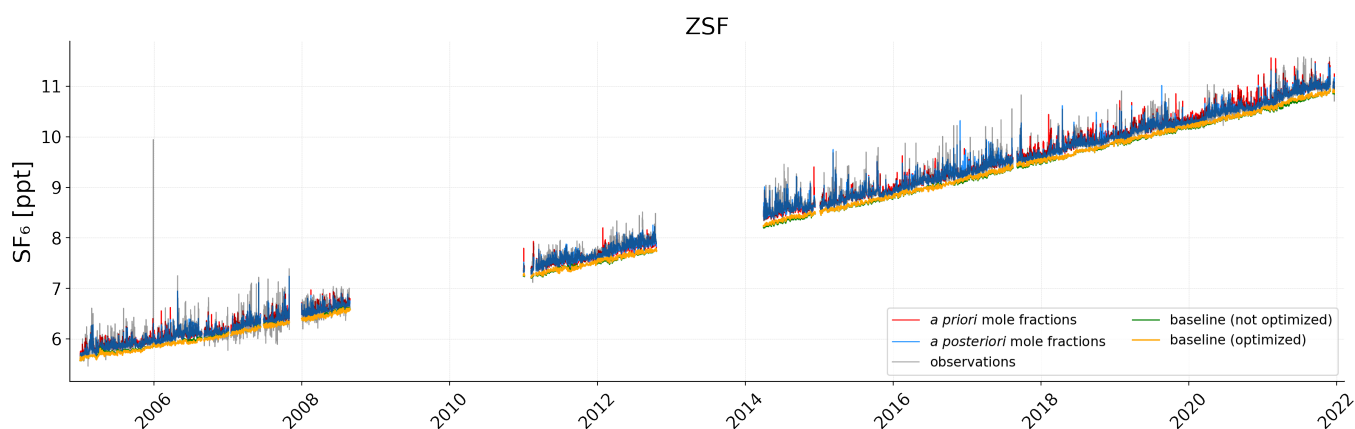

**Figure S23.** Mole fraction time series at the Zugspitze-Schneefernerhaus, (Germany) measurement station. Red lines illustrate the modeled *a priori* mole fractions calculated with the E7P *a priori* emissions and blue lines represent the modeled *a posteriori* mole fractions. The green line illustrates the baseline derived by the GDB method and the orange line shows the optimized baseline. The grey line represents the observed mole fractions.

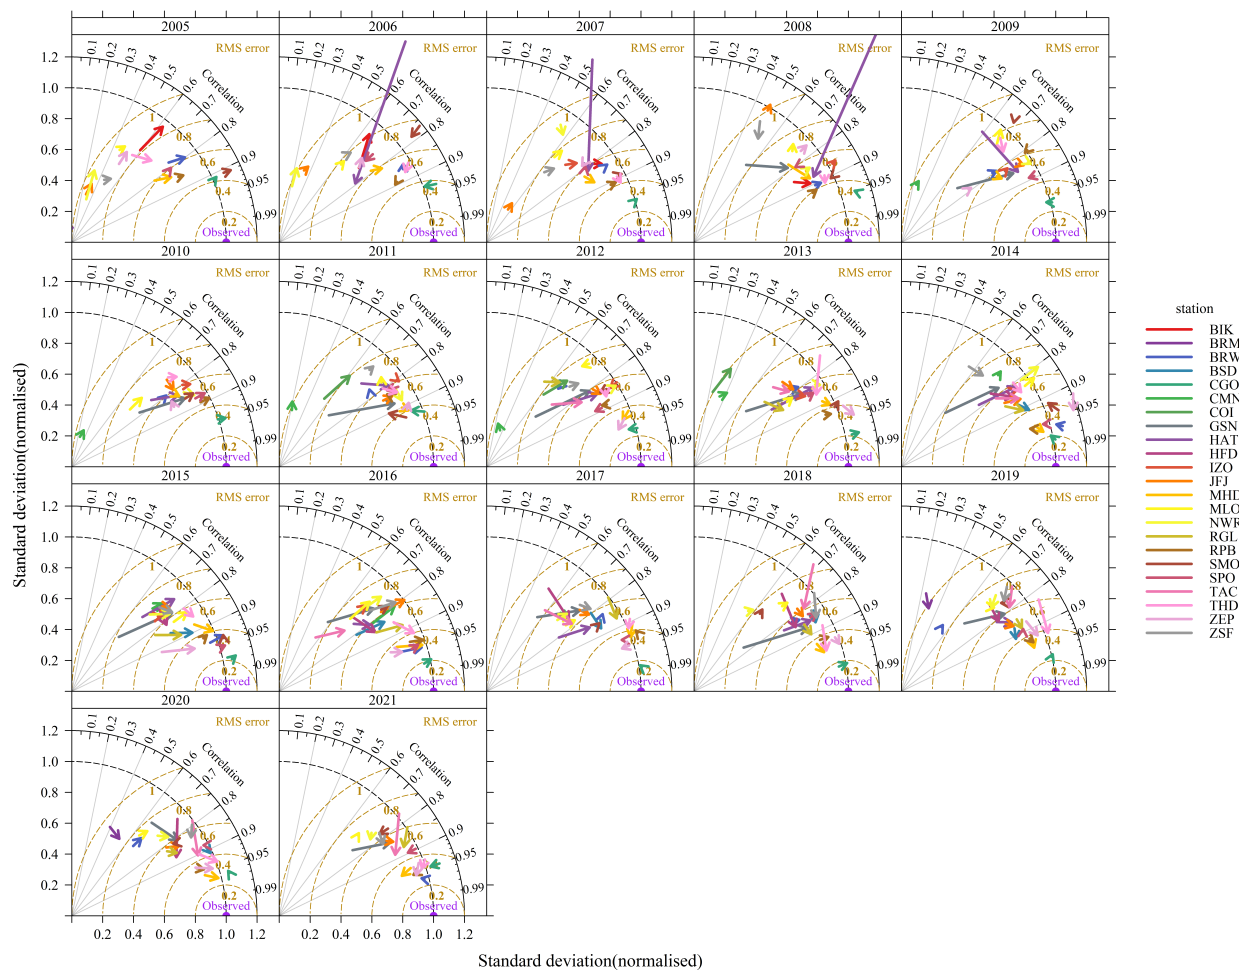

**Figure S24.** Taylor diagrams for comparing the *a priori* and *a posteriori* simulated mole fractions to the observed mixing ratios at all continuous stations, for the years 2005-2021. The diagram summarizes the match between observed and simulated values, by showing three statistics: (i) the Pearson correlation coefficient, represented by the azimuthal angle, (ii) the (against observations) normalized root mean square error (RMS) which is proportional to the distance from the as "observed" labeled purple dot, and (iii) the normalized standard deviation, represented by the radial distance from the origin. Each colored arrow represents a station, where the tail represents the *a priori* and the head the *a posteriori* simulated mole fractions. The length of each arrow, represents the difference between the *a priori* and *a posteriori* modeled mixing ratios with respect to the observed mixing ratios, indicating the correction made by the inversion. We observe large reductions in root mean square error for HAT and GSN almost across all the years. BRM, HFD, TAC, RGL, and ZSF also show significant improvements in error and correlation. The Taylor diagram can clearly distinguish the background stations from the stations that regularly capture emission events. However, also for background stations, small improvements can be seen.

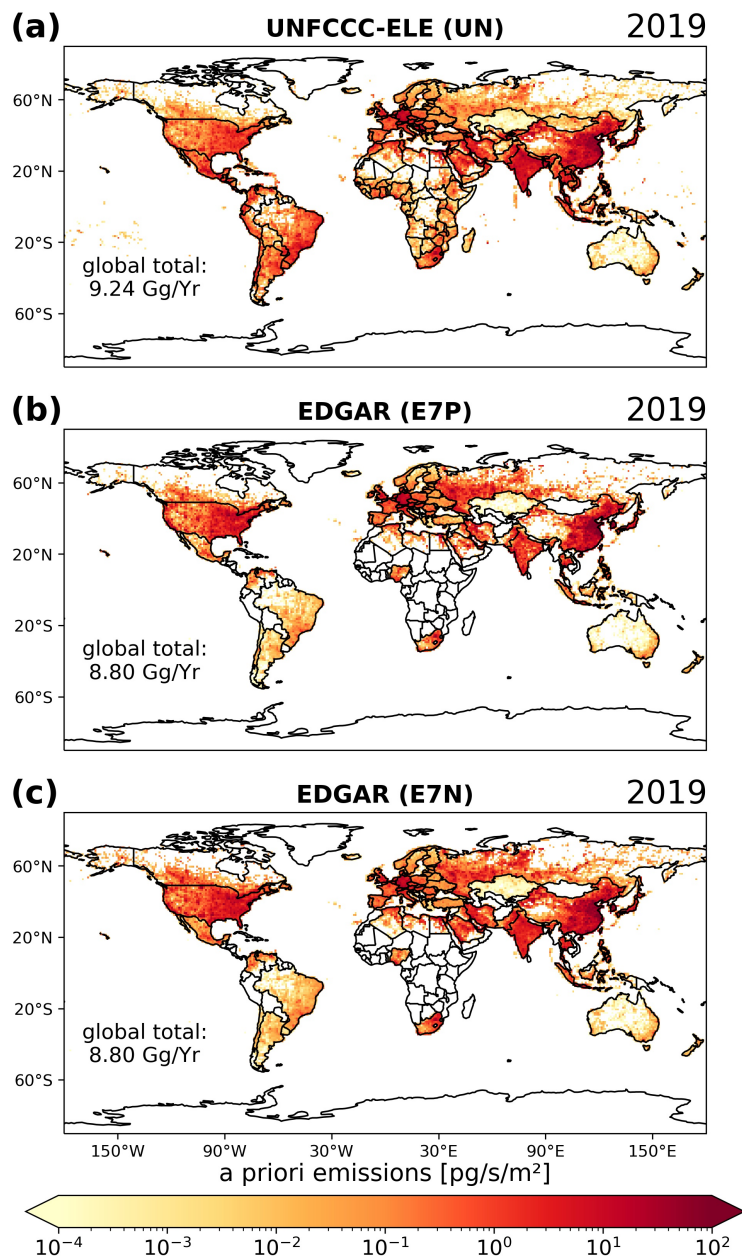

**Figure S25.** *A priori* emissions from the different inventory variation (a) UN, UNFCCC-ELE; (b) E7N, EDGAR; (c) E7P, EDGAR for the year 2019



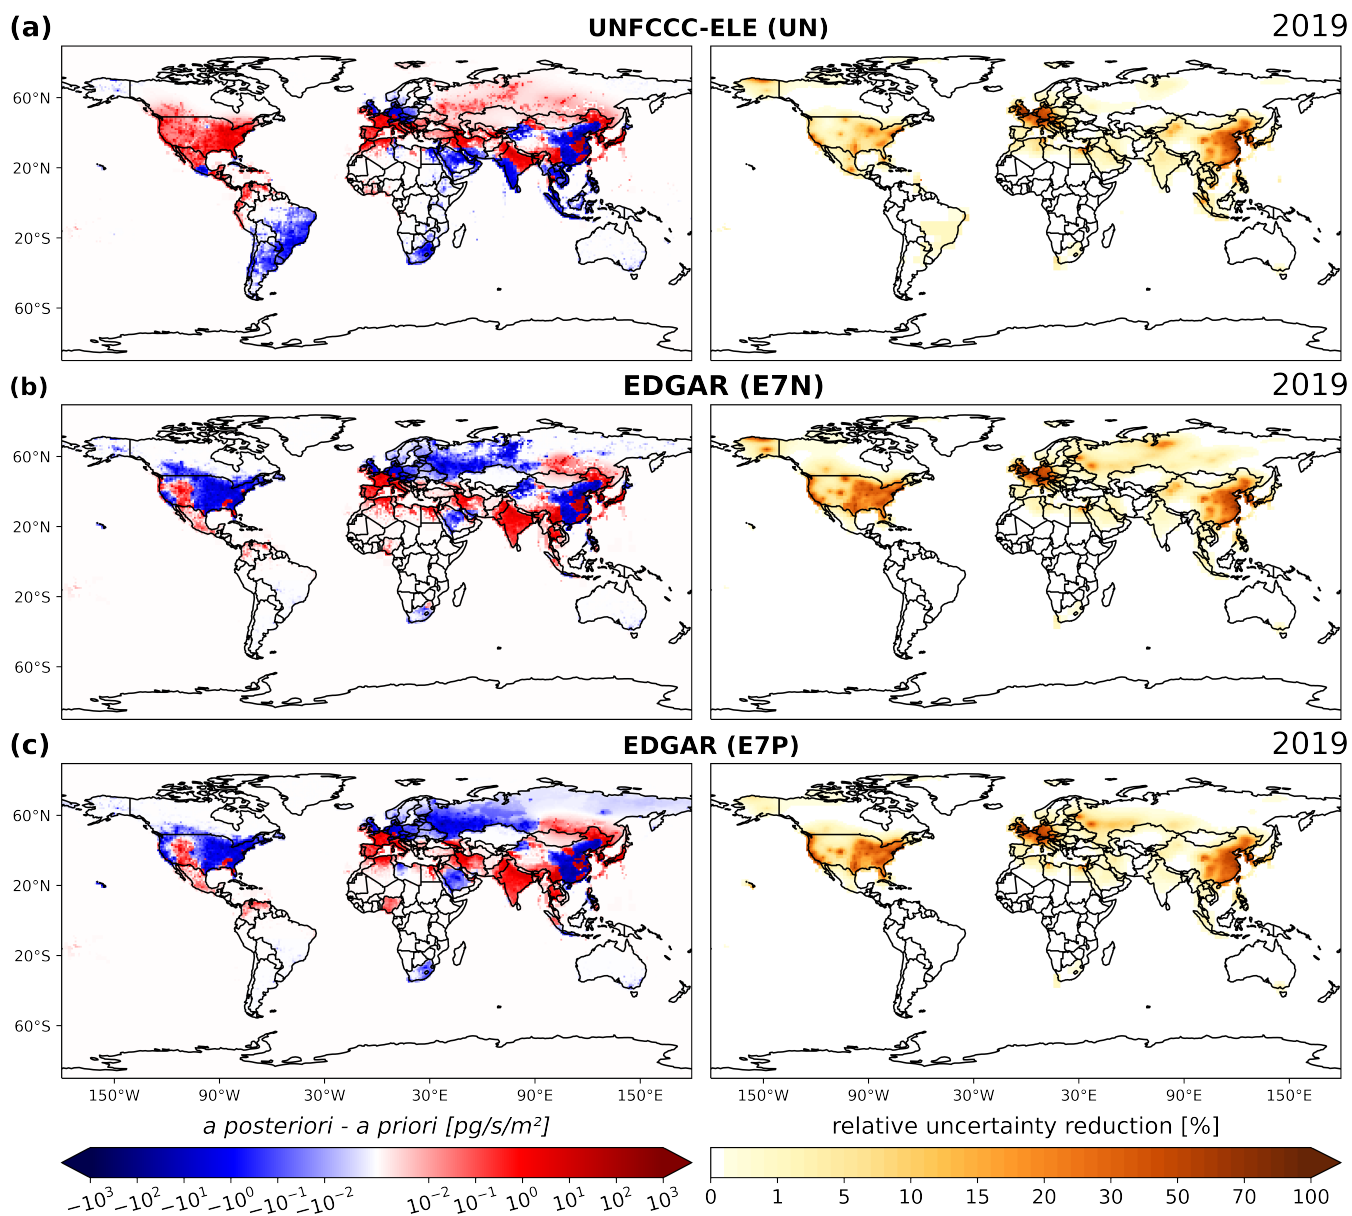

**Figure S26.** Inversion increments (*a posteriori* minus *a priori* emissions; left panels) and the relative uncertainty reductions (right panels) shown when using the priors (a) UN, UNFCCC-ELE; (b) E7N, EDGAR; (c) E7P, EDGAR for the example year of 2019

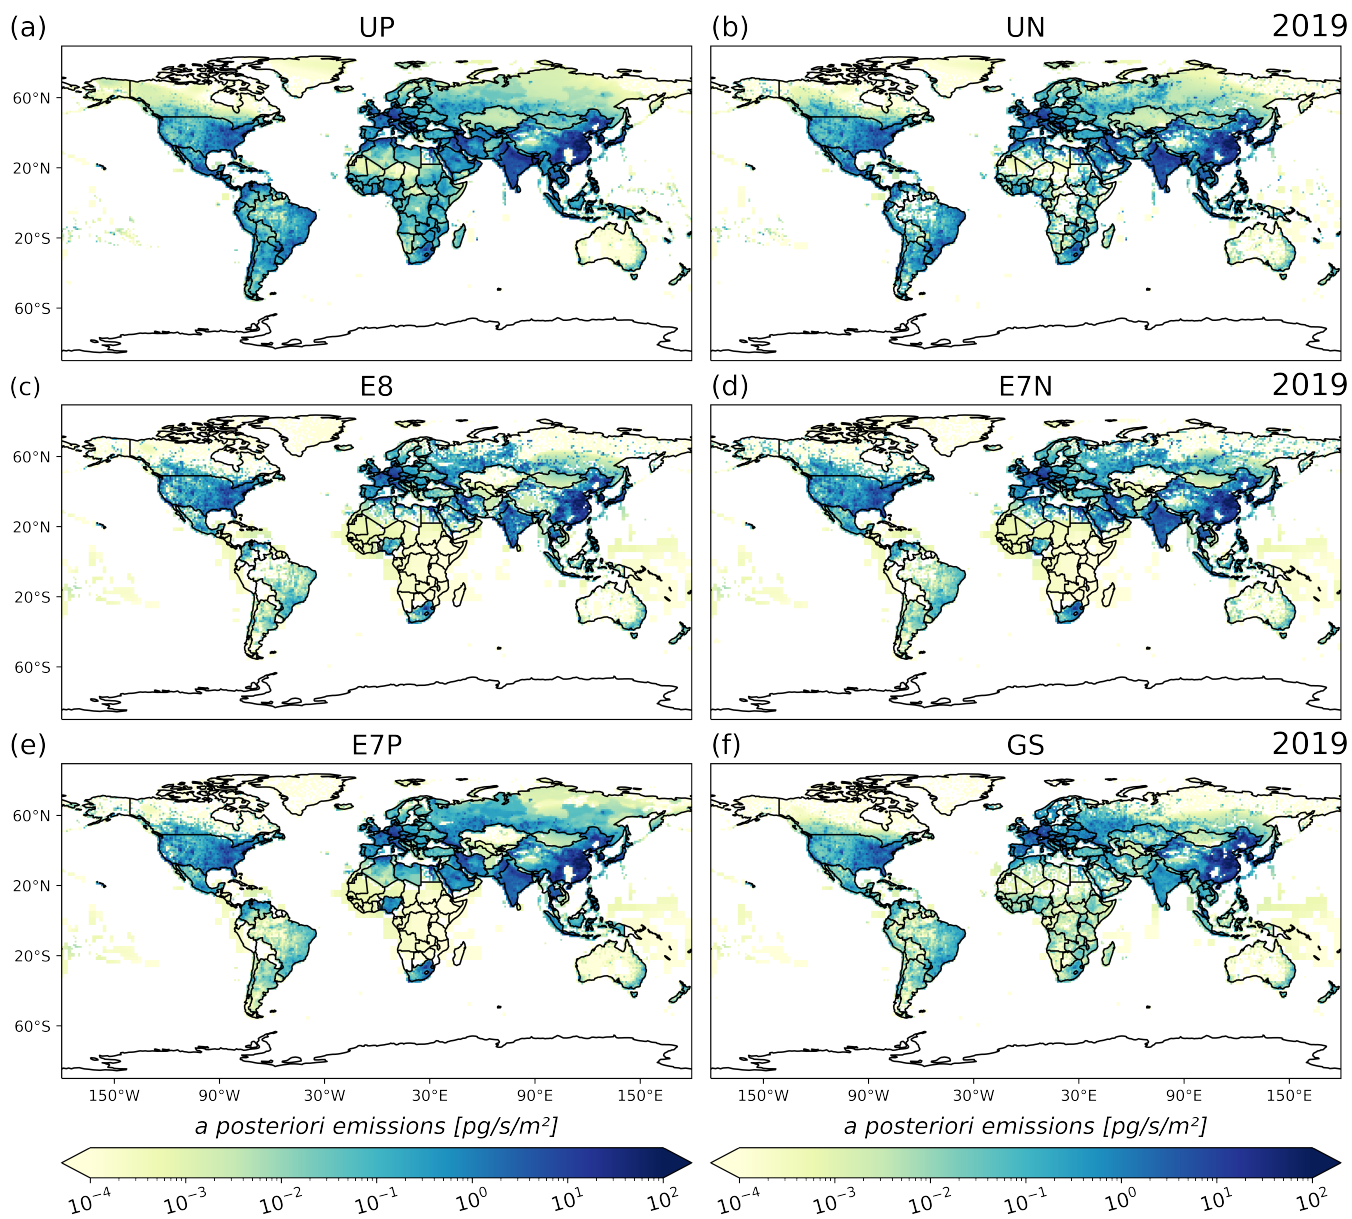

**Figure S27.** Global *a posteriori* emissions for the example year 2019, using six different *a priori* emissions fields: (a) UP, UNFCCC-ELE; (b) UN, UNFCCC-ELE (c) E8, EDGAR; (d) E7N, EDGAR; (e) E7P, EDGAR; (f) GS, GAINS

## S2 Supplementary Tables

**Table S1.** List of surface stations continuously monitoring SF<sub>6</sub>.

| Site ID | Station                             | Organisation        | Latitude | Longitude | Altitude <sup>a</sup> | Period    | total number |
|---------|-------------------------------------|---------------------|----------|-----------|-----------------------|-----------|--------------|
| BIK     | Bialystok, Poland                   | MPI                 | 53.2°N   | 23.0°E    | 180                   | 2005-2008 | 9412         |
| BRM     | Beromünster, Switzerland            | EMPA                | 47.2°N   | 8.2°E     | 797                   | 2019-2020 | 8066         |
| BRW     | Barrow, Alaska, USA                 | NOAA/GML/CATS       | 71.3°N   | 156.6°W   | 18                    | 2005-2021 | 184428       |
| BSD     | Bilsdale, UK                        | UNIVBRIS            | 54.4°N   | 1.1°W     | 379                   | 2014-2020 | 464423       |
| CGO     | Cape Grim, Tasmania                 | CSIRO/AGAGE         | 40.7°S   | 144.7°E   | 164                   | 2005-2021 | 70652        |
| CMN*    | Monte Cimone, Italy                 | UNIURB/AGAGE        | 44.2°N   | 10.7°E    | 2172                  | 2009-2017 | 126546       |
| COI     | Cape Ochiishi, Japan                | NIES                | 43.2°N   | 145.5°E   | 100                   | 2011-2013 | 33412        |
| GSN     | South Korea                         | KNU/AGAGE           | 33.3°N   | 126.2°E   | 89                    | 2008-2021 | 33785        |
| HAT     | Hateruma, Japan                     | NIES                | 24.1°N   | 123.8°E   | 47                    | 2005-2019 | 104922       |
| HFD     | Heathfield, UK                      | UNIURB              | 51.0°N   | 0.2°E     | 157                   | 2014-2020 | 408800       |
| IZO*    | Izaña, Tenerife                     | AEMET               | 28.3°N   | 16.5°W    | 2403                  | 2007-2016 | 92557        |
| JFJ*    | Jungfrauoch, Switzerland            | EMPA/AGAGE          | 46.5°N   | 8.0°E     | 3584                  | 2005-2021 | 87450        |
| MHD     | Mace Head, Ireland                  | UNIVBRIS/AGAGE      | 53.3°N   | 9.9°W     | 26                    | 2005-2021 | 66944        |
| MLO*    | Mauna Loa, Hawaii, USA              | NOAA/GML/CATS       | 19.5°N   | 155.6°W   | 3407                  | 2005-2021 | 179396       |
| NWR*    | Niwot Ridge, Colorado, USA          | NOAA/GML/CATS       | 40.0°N   | 105.5°W   | 3028                  | 2005-2021 | 133475       |
| RGL     | Ridge Hill, UK                      | UNIVBRIS            | 52.0°N   | 2.5°W     | 294                   | 2012-2021 | 501617       |
| RPB     | Ragged Point, Barbados              | UNIVBRIS/AGAGE      | 13.2°N   | 59.4°W    | 50                    | 2005-2021 | 55463        |
| SMO     | Cape Matatulu, American Samoa, USA  | NOAA/GML/CATS/AGAGE | 14.3°S   | 170.6°W   | 87                    | 2005-2021 | 121670       |
| SPO     | South Pole, Antarctica              | NOAA/GML/CATS       | 90.0°S   | 24.8°W    | 2820                  | 2005-2021 | 174672       |
| SUM     | Summit, Greenland                   | NOAA/GML/CATS       | 72.6°N   | 38.5°W    | 3228                  | 2007-2017 | 98620        |
| TAC     | Tacolneston Tall Tower, UK          | UNIVBRIS/AGAGE      | 52.5°N   | 1.1°E     | 183                   | 2012-2021 | 57590        |
| THD     | Trinidad Head, USA                  | SIO/EAS/AGAGE       | 41.1°N   | 124.2°W   | 127                   | 2005-2021 | 68466        |
| ZEP     | Zeppelin, Ny-Alesund, Norway        | NILU/AGAGE          | 78.9°N   | 11.9°E    | 490                   | 2005-2021 | 42102        |
| ZSF*    | Zugspitze-Schneefernerhaus, Germany | UBAG                | 47.4°N   | 11.0°E    | 2670                  | 2005-2021 | 156336       |

<sup>a</sup> The altitude specifies the sampling height in meters above sea level. Stations considered as mountain sites are marked with an asterisk.

**Table S2.** List of flask measurement sampling sites (1)

| Site ID | Station                                                          | Organisation       | Latitude | Longitude | Altitude <sup>a</sup> | Period      | total number |
|---------|------------------------------------------------------------------|--------------------|----------|-----------|-----------------------|-------------|--------------|
| ABP     | Arembepe, Bahia, Brazil                                          | NOAA/GML/CCGG/INPE | 12.8° S  | 38.2° W   | 6                     | 2006-2010   | 114          |
| ALT     | Alert, Canada                                                    | NOAA/GML/CCGG      | 82.5° N  | 62.5° W   | 190                   | 2005-2021   | 1162         |
| ALT     | Alert, Canada                                                    | NOAA/HATS          | 82.5° N  | 62.5° W   | 200                   | 2005-2013   | 425          |
| AMT     | Argyle, Maine, USA                                               | NOAA/GML/CCGG      | 45.0° N  | 68.7° W   | 157                   | 2005-2008   | 72           |
| AMT     | Argyle, Maine, USA                                               | NOAA/HATS          | 45.0° N  | 68.7° W   | 160                   | 2008-2021   | 1781         |
| AMY     | Anmyeon-do, Republic of Korea                                    | NOAA/GML/CCGG      | 36.5° N  | 126° E    | 87.0                  | 2013-2021   | 340          |
| ASC     | Ascension Island, UK                                             | NOAA/GML/CCGG      | 8.0° S   | 14.4° W   | 90                    | 2005-2021   | 1468         |
| ASK     | Assekrem, Algeria, UK                                            | NOAA/GML/CCGG      | 23.3° N  | 5.6° E    | 2715                  | 2005-2020   | 713          |
| AZR     | Serreta (Terceira), Portugal                                     | NOAA/GML/CCGG      | 38.8° N  | 27.4° W   | 24                    | 2005-2021   | 489          |
| BAL     | Baltic Sea, Poland                                               | NOAA/GML/CCGG      | 55.4° N  | 17.2° E   | 28                    | 2005-2011   | 545          |
| BAO     | Boulder Atmospheric Observatory, Colorado, USA                   | NOAA/GML/GGGRN     | 40.1° N  | 105.0° W  | 1884                  | 2007-2016   | 2688         |
| BHD     | Baring Head, New Zealand                                         | NOAA/GML/CCGG      | 41.4° S  | 174.9° E  | 912                   | 2005-2021   | 266          |
| BKT     | Bukit Kototabang, Indonesia                                      | NOAA/GML/CCGG      | 0.2° S   | 100.3° E  | 875                   | 2005-2021   | 728          |
| BME     | St. Davids Head, Bermuda                                         | NOAA/GML/CCGG      | 32.4° N  | 64.6° W   | 17                    | 2005-2010   | 77           |
| BMW     | Tudor Hill (Bermuda), UK                                         | NOAA/GML/CCGG      | 32.3° N  | 64.9° W   | 55                    | 2005-2021   | 655          |
| BRW     | Barrow, Alaska, USA                                              | NOAA/GML/CCGG      | 71° N    | 156.6° W  | 1628                  | 2005 - 2021 | 1656         |
| BRW     | Barrow, Alaska, USA                                              | NOAA/HATS          | 71° N    | 156.6° W  | 27                    | 2005 - 2013 | 400          |
| BSC     | Constanta (Black Sea), Romania                                   | NOAA/GML/CCGG      | 44.2° N  | 28.7° E   | 5                     | 2005-2011   | 330          |
| CBA     | Cold Bay (AK), USA                                               | NOAA/GML/CCGG      | 55.2° N  | 162.7° W  | 49                    | 2005-2021   | 1437         |
| CGO     | Cape Grim, Tasmania                                              | NOAA/GML/CCGG      | 40.7° S  | 144.7° E  | 164                   | 2005-2021   | 623          |
| CGO     | Cape Grim, Tasmania                                              | NOAA/HATS          | 40.7° S  | 144.7° E  | 164                   | 2005-2013   | 344          |
| CHR     | Christmas Island, Kiribati                                       | NOAA/GML/CCGG      | 1.7° N   | 157.2° W  | 5                     | 2005-2020   | 463          |
| CIB     | Centro de Investigacion de la Baja Atmosfera (CIBA), Spain       | NOAA/GML/CCGG      | 41.8° N  | 4.9° W    | 850                   | 2009-2021   | 547          |
| CPT     | Cape Point, South Africa                                         | NOAA/GML/CCGG      | 34.4° S  | 18.5° E   | 260                   | 2010-2021   | 398          |
| CRV     | Carbon in Arctic Reservoirs Vulnerability Experiment (CARVE), US | NOAA/HATS          | 65.0° N  | 147.6° W  | 643                   | 2012-2017   | 79           |
| CRV     | Carbon in Arctic Reservoirs Vulnerability Experiment (CARVE), US | NOAA/GML/GGGRN     | 65.0° N  | 147.6° W  | 643                   | 2011-2021   | 1535         |
| CRZ     | Crozet Island, France                                            | NOAA/GML/CCGG      | 46.4° S  | 51.8° E   | 202                   | 2005-2021   | 733          |
| DSI     | Dongsha Island, Taiwan                                           | NOAA/GML/CCGG      | 20.7° N  | 116.7° E  | 8                     | 2010-2021   | 473          |
| EIC     | Easter Island, Chile                                             | NOAA/GML/CCGG      | 27.2° S  | 109.4° W  | 64                    | 2005-2019   | 550          |
| GMI     | Guam (Mariana Island), USA                                       | NOAA/GML/CCGG      | 13.4° N  | 144.7° E  | 7                     | 2005-2021   | 923          |
| HBA     | Halley, UK                                                       | NOAA/GML/CCGG      | 75.6° S  | 26.2° W   | 35                    | 2005-2021   | 572          |
| HFM     | Harvard Forest (MA), USA                                         | NOAA/GML/GGGRN     | 42.5° N  | 72.2° W   | 370                   | 2016        | 12           |
| HPB     | Hohenpeissenberg, Germany                                        | NOAA/GML/CCGG      | 47.8° N  | 11.0° E   | 941                   | 2006-2021   | 841          |
| HSU     | Humboldt State University, USA                                   | NOAA/GML/CCGG      | 41.1° N  | 124.6° W  | 8                     | 2008-2017   | 87           |
| HUN     | Hegyatsal, Hungary                                               | NOAA/GML/CCGG      | 47.0° N  | 16.6° E   | 344                   | 2005-2021   | 741          |
| ICE     | Storhofdi, Iceland                                               | NOAA/GML/CCGG      | 63.4° N  | 20.3° W   | 126                   | 2005-2021   | 846          |
| IZO     | Izaña, Tenerife                                                  | NOAA/GML/CCGG      | 28.3° N  | 16.5° W   | 2378                  | 2005 - 2021 | 804          |
| KEY     | Key Biscane (FL), USA                                            | NOAA/GML/CCGG      | 25.7° N  | 80.2° W   | 6                     | 2005-2021   | 692          |
| KLM     | Kohler Mesa, USA                                                 | NOAA/GML/GGGRN     | 40.0° N  | 105.3° W  | 1730                  | 2006        | 47           |
| KUM     | Cape Kumukahi (HI), USA                                          | NOAA/GML/CCGG      | 19.5° N  | 154.8° W  | 5                     | 2005-2021   | 1676         |
| KUM     | Cape Kumukahi (HI), USA                                          | NOAA/HATS          | 19.7° N  | 155.0° W  | 36                    | 2005-2013   | 434          |
| KZD     | Sary Taukum, Kazakhstan                                          | NOAA/GML/CCGG      | 44.1° N  | 76.9° E   | 600                   | 2005-2009   | 224          |
| KZM     | Plateau Assy, Kazakhstan                                         | NOAA/GML/CCGG      | 43.2° N  | 77.9° E   | 2524                  | 2005-2009   | 214          |
| LEF     | Park Falls (WI), USA                                             | NOAA/GML/CCGG      | 45.9° N  | 90.3° W   | 868                   | 2005-2021   | 142          |
| LEF     | Park Falls (WI), USA                                             | NOAA/GML/GGGRN     | 45.9° N  | 90.3° W   | 868                   | 2006-2021   | 3414         |
| LEF     | Park Falls (WI), USA                                             | NOAA/HATS          | 45.9° N  | 90.3° W   | 482                   | 2005-2013   | 362          |
| LEW     | Lewisburg, Pennsylvania, USA                                     | NOAA/GML/GGGRN     | 40.9° N  | 76.9° W   | 261                   | 2015-2021   | 717          |
| LLB     | Lac La Biche, Alberta, Canada                                    | NOAA/GML/CCGG      | 55.0° N  | 112.5° W  | 568                   | 2008-2013   | 213          |
| LLN     | Lulin, Taiwan, Province of China                                 | NOAA/GML/CCGG      | 23.5° N  | 120.9° E  | 2867                  | 2006-2021   | 604          |
| LMP     | Lampedusa, Italy                                                 | NOAA/GML/CCGG      | 35.5° N  | 12.6° E   | 50                    | 2006-2021   | 659          |

<sup>a</sup> The altitude specifies the sampling height in meters above sea level.

**Table S3.** List of flask measurement sampling sites (2).

| Site ID | Station                                                     | Organisation       | Latitude | Longitude | Altitude <sup>a</sup> | Period      | total number |
|---------|-------------------------------------------------------------|--------------------|----------|-----------|-----------------------|-------------|--------------|
| MBO     | Mt. Bachelor Observatory, USA                               | NOAA/GML/GGGRN     | 44.0° N  | 121.7° W  | 2742                  | 2011-2021   | 1914         |
| MEX     | Mex High Altitude Global Climate Observation Center, Mexico | NOAA/GML/CCGG      | 19.0° N  | 97.3° W   | 4469                  | 2009-2021   | 488          |
| MHD     | Mace Head, Ireland                                          | NOAA/GML/CCGG      | 53.3° N  | 9.9° W    | 26                    | 2005-2021   | 777          |
| MHD     | Mace Head, Ireland                                          | NOAA/HATS          | 53.3° N  | 9.9° W    | 42                    | 2005-2013   | 193          |
| MID     | Sand Island, Midway, USA                                    | NOAA/GML/CCGG      | 28.2° N  | 177.4° W  | 12                    | 2005-2021   | 841          |
| MKN     | Mt. Kenya, Kenya                                            | NOAA/GML/CCGG      | 0.1° S   | 37.3° E   | 3649                  | 2005-2011   | 126          |
| MLO     | Mauna Loa, Hawaii, USA                                      | NOAA/GML/CCGG      | 19.5° N  | 155.6° W  | 3437                  | 2005-2021   | 1746         |
| MLO     | Mauna Loa, Hawaii, USA                                      | NOAA/HATS          | 19.5° N  | 155.6° W  | 3433                  | 2005-2013   | 432          |
| MLO     | Mauna Loa, Hawaii, USA                                      | NOAA/GML/GGGRN     | 19.5° N  | 155.6° W  | 3433                  | 2021        | 68           |
| MRC     | Marcellus Pennsylvania, USA                                 | NOAA/GML/CCGG      | 41.5° N  | 76.3° W   | 652                   | 2015-2021   | 713          |
| MSH     | Mashpee, Massachusetts, USA                                 | NOAA/GML/GGGRN     | 41.7° N  | 70.5° W   | 78                    | 2016-2021   | 503          |
| MVY     | Marthas Vineyard, Massachusetts, USA                        | NOAA/GML/GGGRN     | 41.3° N  | 70.6° W   | 16                    | 2007-2011   | 210          |
| MWO     | Mt. Wilson Observatory, USA                                 | NOAA/GML/GGGRN     | 34.2° N  | 118.1° W  | 1775                  | 2010-2021   | 4437         |
| NAT     | Natal, Brazil                                               | NOAA/GML/CCGG/INPE | 5.6° S   | 35.2° W   | 49                    | 2010-2020   | 385          |
| NMB     | Gobabeb, Namibia                                            | NOAA/GML/CCGG      | 23.6° S  | 15.0° E   | 461                   | 2006-2021   | 614          |
| NWB     | NW Baltimore, USA                                           | NOAA/GML/GGGRN     | 39.3° N  | 76.7° W   | 190                   | 2018-2021   | 41           |
| NWR     | Niwot Ridge, Colorado                                       | NOAA/GML/CCGG      | 40.1° N  | -105.6° W | 3526                  | 2005 - 2021 | 847          |
| NWR     | Niwot Ridge, Colorado                                       | NOAA/HATS          | 40.1° N  | -105.6° W | 3523                  | 2005 - 2013 | 342          |
| NWR     | Niwot Ridge, Colorado                                       | NOAA/GML/GGGRN     | 40.1° N  | -105.6° W | 3523                  | 2005 - 2021 | 3712         |
| OBN     | Obninsk, Colorado, Russia                                   | NOAA/HATS          | 55.1° N  | 36.6° E   | 484                   | 2005-2009   | 146          |
| OXK     | Ochsenkopf, Germany                                         | NOAA/GML/CCGG      | 50.0° N  | 11.8° E   | 1181                  | 2006-2021   | 404          |
| PAL     | Pallas, Finland                                             | NOAA/GML/CCGG      | 68.0° N  | 24.1° E   | 570                   | 2005-2021   | 797          |
| PCO     | Pico, Azores, Portugal                                      | NOAA/HATS          | 38.5° N  | 28.4° W   | 2230                  | 2010-2011   | 6            |
| PSA     | Palmer Station, USA                                         | NOAA/GML/CCGG      | 64.9° S  | 64.0° W   | 15                    | 2005-2021   | 835          |
| PSA     | Palmer Station, USA                                         | NOAA/HATS          | 64.9° S  | 64.0° W   | 13                    | 2005-2013   | 183          |
| PTA     | Point Arena (CA), USA                                       | NOAA/GML/CCGG      | 39.0° N  | 123.7° W  | 22                    | 2005-2011   | 291          |
| RPB     | Ragged Point, Barbados                                      | NOAA/GML/CCGG      | 13.2° N  | 59.4° W   | 20                    | 2005-2021   | 841          |
| SCT     | Beech Island, South Carolina, USA                           | NOAA/GML/GGGRN     | 33.4° N  | 81.8° W   | 420                   | 2008-2021   | 2778         |
| SDZ     | Shangdianzi, Peoples Republic of China                      | NOAA/GML/CCGG      | 40.6° N  | 117.1° E  | 298                   | 2009-2015   | 154          |
| SEY     | Mahe Island, Seychelles                                     | NOAA/GML/CCGG      | 4.7° S   | 55.5° E   | 7                     | 2005-2021   | 773          |
| SGP     | Southern Great Plains, Oklahoma, USA                        | NOAA/GML/CCGG      | 36.7° N  | 97.5° W   | 374                   | 2005-2021   | 831          |
| SGP     | Southern Great Plains, Oklahoma, USA                        | NOAA/GML/GGGRN     | 36.7° N  | 97.5° W   | 374                   | 2010-2021   | 298          |
| SHM     | Shemya Island, USA                                          | NOAA/GML/CCGG      | 52.7° N  | 174.1° E  | 28                    | 2005-2021   | 797          |
| SMO     | Cape Matatulu, American Samoa, USA                          | NOAA/GML/CCGG      | 14.3° S  | 170.6° W  | 60                    | 2005-2021   | 1561         |
| SMO     | Cape Matatulu, American Samoa, USA                          | NOAA/HATS          | 14.3° S  | 170.6° W  | 77                    | 2005-2013   | 451          |
| SPO     | South Pole, Antarctica                                      | NOAA/GML/CCGG      | 90.0° S  | 24.8° W   | 2820                  | 2005-2021   | 1228         |
| SPO     | South Pole, Antarctica                                      | NOAA/HATS          | 90.0° S  | 24.8° W   | 2837                  | 2005-2021   | 296          |
| STM     | Ocean Station M, Norway                                     | NOAA/GML/CCGG      | 66.0° N  | 2.0° E    | 5                     | 2005-2009   | 467          |
| STR     | Sutro Tower, San Francisco, California, USA                 | NOAA/GML/GGGRN     | 37.8° N  | 122.5° W  | 426                   | 2007-2021   | 6790         |
| SUM     | Summit, Greenland                                           | NOAA/GML/CCGG      | 72.6° N  | 38.5° W   | 3214                  | 2005-2021   | 873          |
| SUM     | Summit, Greenland                                           | NOAA/HATS          | 72.6° N  | 38.5° W   | 3212                  | 2005-2013   | 233          |
| SYO     | Syowa Station, Antarctic, Japan                             | NOAA/GML/CCGG      | 69.0° S  | 39.6° E   | 17                    | 2005-2021   | 403          |
| TAC     | Tacolneston Tall Tower, UK                                  | NOAA/GML/CCGG      | 52.5° N  | 1.1° E    | 236                   | 2014-2016   | 50           |
| TAP     | Tae-ahn Peninsula, Republic of Korea                        | NOAA/GML/CCGG      | 36.7° N  | 126.1° E  | 21                    | 2005-2021   | 835          |
| THD     | Trinidad Head, USA                                          | NOAA/GML/CCGG      | 41.1° N  | 124.2° W  | 112                   | 2005-2017   | 615          |
| THD     | Trinidad Head, USA                                          | NOAA/HATS          | 41.1° N  | 124.2° W  | 120                   | 2005-2013   | 382          |
| TIK     | Tiksi, Russian Federation                                   | NOAA/GML/CCGG      | 71.6° N  | 128.9° E  | 29                    | 2011-2018   | 340          |
| TPI     | Taiping Island                                              | NOAA/GML/CCGG      | 10.4° N  | 144.4° E  | 9                     | 2019 - 2021 | 121          |
| USH     | Ushuaia, Argentina                                          | NOAA/GML/CCGG      | 54.8° S  | 68.3° W   | 32                    | 2005-2021   | 616          |
| USH     | Ushuaia, Argentina                                          | NOAA/HATS          | 54.8° S  | 68.3° W   | 15                    | 2005-2010   | 46           |
| UTA     | Wendover (UT), USA                                          | NOAA/GML/CCGG      | 39.9° N  | 113.7° W  | 1332                  | 2005-2021   | 910          |
| UUM     | Ulaan Uul, Mongolia                                         | NOAA/GML/CCGG      | 44.5° N  | 111.1° E  | 1012                  | 2005-2021   | 734          |
| WBI     | West Branch, Iowa, USA                                      | NOAA/GML/GGGRN     | 41.7° N  | 91.4° W   | 621                   | 2007-2021   | 3657         |
| WGC     | Walnut Grove, California, USA                               | NOAA/GML/GGGRN     | 38.3° N  | 121.5° W  | 94                    | 2007-2021   | 2590         |
| WIS     | Sede Boker, Israel                                          | NOAA/GML/CCGG      | 30.6° N  | 34.9° E   | 379                   | 2005-2021   | 815          |
| WKT     | Moody, Texas, USA                                           | NOAA/GML/CCGG      | 31.3° N  | 97.3° W   | 372                   | 2005-2010   | 176          |
| WKT     | Moody, Texas, USA                                           | NOAA/GML/GGGRN     | 31.3° N  | 97.3° W   | 372                   | 2006-2021   | 3101         |
| WLG     | Mt. Waliguan, Peoples Republic of China                     | NOAA/GML/CCGG      | 36.3° N  | 100.9° E  | 3827                  | 2005-2021   | 660          |
| ZEP     | Zeppelin, Ny-Alesund, Norway                                | NOAA/GML/CCGG      | 78.9° N  | 11.9° E   | 479                   | 2005-2021   | 848          |

<sup>a</sup> The altitude specifies the sampling height in meters above sea level.

**Table S4.** Measurements from moving platforms.

| Site ID | Measurements Site                                                                               | Organisation       | Altitude <sup>a</sup> range | Period           | total number | platform |
|---------|-------------------------------------------------------------------------------------------------|--------------------|-----------------------------|------------------|--------------|----------|
| AAO     | Airborne Aerosol Observatory, Bondville, Illinois, USA                                          | NOAA/GML/CCAVPN    | 373 - 4859                  | 2006 - 2009      | 3001         | aircraft |
| ACG     | Alaska Coast Guard, USA                                                                         | NOAA/GML/CCAVPN    | 48 - 8857                   | 2009 - 2021      | 1758         | aircraft |
| ACT     | Atmospheric Carbon and Transport - America, USA                                                 | NOAA/GML/CCAVPN    | 117 - 9060                  | 2016 - 2019      | 1477         | aircraft |
| AOC     | Atlantic Ocean Cruise                                                                           | NOAA/ESRL/GMD      | 10                          | 2005             | 16           | ship     |
| BAO     | Boulder Atmospheric Observatory, Colorado, USA                                                  | NOAA/GML/CCAVPN    | 1849 - 4794                 | 2008             | 12           | aircraft |
| BGI     | Bradgate, Iowa, USA                                                                             | NOAA/GML/CCAVPN    | 598 - 8074                  | 2005             | 296          | aircraft |
| BII     | Biak, Indonesia                                                                                 | MUE/TU/NIPR        | 17200 - 28700               | 2015             | 7            | balloon  |
| BNE     | Beaver Crossing, Nebraska, USA                                                                  | NOAA/GML/CCAVPN    | 597 - 8157                  | 2005 - 2011      | 969          | aircraft |
| CAR     | Briggsdale, Colorado, USA                                                                       | NOAA/GML/CCAVPN    | 1585 - 8469                 | 2005 - 2021      | 4025         | aircraft |
| CARIBIC | Civil Aircraft for the Regular Investigation of the atmosphere Based on an Instrument Container | KIT/MPIC           | 947 - 12525                 | 2005 - 2020      | 7379         | aircraft |
| CMA     | Offshore Cape May, New Jersey, USA                                                              | NOAA/GML/CCAVPN    | 247 - 8119                  | 2005 - 2021      | 3073         | aircraft |
| CON     | CONTRAIL (Comprehensive Observation Network for TRace gases by AirLiner)                        | NIES/MRI           | 780 - 13110                 | 2005 - 2017      | 3192         | aircraft |
| CRS     | Miscellaneous Cruises                                                                           | NOAA/ESRL/GMD      | 20                          | 2005 - 2011      | 120          | ship     |
| CRV     | Carbon in Arctic Reservoirs Vulnerability Experiment (CARVE), USA                               | NOAA/GML/CCAVPN    | 2 - 5526                    | 2011 - 2017      | 2446         | aircraft |
| DND     | Dahlen, North Dakota, USA                                                                       | NOAA/GML/CCAVPN    | 517 - 8131                  | 2005 - 2016      | 1941         | aircraft |
| DRP     | Drake Passage                                                                                   | NOAA/ESRL/GMD      | 10                          | 2005 - 2017      | 375          | ship     |
| ECO     | East Coast Outflow, USA                                                                         | NOAA/GML/CCAVPN    | 146 - 4564                  | 2018, 2020       | 343          | aircraft |
| ESP     | Estevan Point, British Columbia, Canada                                                         | NOAA/GML/CCAVPN    | 18 - 5819                   | 2005 - 2021      | 4310         | aircraft |
| ETL     | East Trout Lake, Saskatchewan, Canada                                                           | NOAA/GML/CCAVPN    | 599 - 7823                  | 2005 - 2020      | 3041         | aircraft |
| FAM     | FAAM Aircraft, United Kingdom                                                                   | NOAA/ESRL/GMD      | 129 - 2000                  | 2014 - 2015      | 12           | aircraft |
| FWI     | Fairchild, Wisconsin, USA                                                                       | NOAA/GML/CCAVPN    | 589 - 8071                  | 2005             | 314          | aircraft |
| HAA     | Molokai Island, Hawaii, USA                                                                     | NOAA/GML/CCAVPN    | 315 - 8096                  | 2005 - 2008      | 976          | aircraft |
| HFM     | Harvard Forest, Massachusetts, USA                                                              | NOAA/GML/CCAVPN    | 582 - 8062                  | 2005 - 2007      | 717          | aircraft |
| HIL     | Homer, Illinois USA                                                                             | NOAA/GML/CCAVPN    | 21 - 8117                   | 2005 - 2021      | 3097         | aircraft |
| INX     | INFLUX (Indianapolis Flux Experiment), USA                                                      | NOAA/GML/CCAVPN    | 302 - 3518                  | 2010 - 1016      | 350          | aircraft |
| LEF     | Park Falls, Wisconsin, USA                                                                      | NOAA/GML/CCAVPN    | 558 - 4034                  | 2005 - 2017      | 3268         | aircraft |
| MCI     | Mid Continent Intensive, USA                                                                    | NOAA/GML/CCAVPN    | 359 - 3702                  | 2007 - 2008      | 128          | aircraft |
| MRC     | Marcellus Pennsylvania, USA                                                                     | NOAA/GML/CCAVPN    | 879 - 3123                  | 2015             | 77           | aircraft |
| NHA     | Offshore Portsmouth, New Hampshire (Isles of Shoals) USA                                        | NOAA/GML/CCAVPN    | 115 - 8136                  | 2005 - 2021      | 3689         | aircraft |
| NSA     | North Slope, Alaska, NSA                                                                        | NOAA/GML/CCAVPN    | 10 - 6377                   | 2015 - 2016      | 378          | aircraft |
| NSK     | Northern Saskatchewan, Canada                                                                   | NOAA/GML/CCAVPN    | 819 - 6576                  | 2020 - 2021      | 45           | aircraft |
| OIL     | Oglesby, Illinois                                                                               | NOAA/GML/CCAVPN    | 529 - 8121                  | 2005             | 338          | aircraft |
| PAN     | Pantanal, Mato Grosso do Sul, Brazil                                                            | INPE               | 152 - 4419                  | 2017 - 2019      | 438          | aircraft |
| PAO     | Pacific-Atlantic Ocean                                                                          | NOAA/ESRL/GMD      | 10                          | 2006             | 90           | ship     |
| PFA     | Poker Flat, Alaska, USA                                                                         | NOAA/GML/CCAVPN    | 131 - 7604                  | 2005 - 2021      | 3759         | aircraft |
| POC     | Pacific Ocean                                                                                   | NOAA/ESRL/GMD      | 20                          | 2005 - 2017      | 1834         | ship     |
| RTA     | Rarotonga, Cook Islands                                                                         | NOAA/GML/CCAVPN    | 15 - 6527                   | 2005 - 2021      | 1943         | aircraft |
| SAN     | Santarem, Brazil                                                                                | INPE               | 152 - 4268                  | 2007 - 2009      | 927          | aircraft |
| SCA     | Offshore Charleston, South Carolina, USA                                                        | NOAA/GML/CCAVPN    | 218 - 13278                 | 2005 - 2021      | 3404         | aircraft |
| SGP     | Southern Great Plains, Oklahoma, USA                                                            | NOAA/GML/CCAVPN    | 172 - 12926                 | 2006 - 2021      | 6587         | aircraft |
| SYO     | Syowa Station, Antarctica, Japan                                                                | TU/AND/MUE         | 14600 - 28500               | 2008, 2012, 2013 | 6            | balloon  |
| TGC     | Offshore Corpus Christi, Texas, USA                                                             | NOAA/GML/CCAVPN    | 243 - 8207                  | 2005 - 2021      | 2589         | aircraft |
| THD     | Trinidad Head, California, USA                                                                  | NOAA/GML/CCAVPN    | 152 - 8131                  | 2005 - 2021      | 2437         | aircraft |
| ULB     | Ulaanbaatar, Mongolia                                                                           | NOAA/GML/CCAVPN    | 1511 - 4425                 | 2004 - 2009      | 503          | aircraft |
| WBI     | West Branch, Iowa, USA                                                                          | NOAA/GML/CCAVPN    | 543 - 8204                  | 2005 - 2021      | 2847         | aircraft |
| WGC     | Walnut Grove, California, USA                                                                   | NOAA/GML/CCAVPN    | 6 - 3177                    | 2008 - 2009      | 159          | aircraft |
| WPC     | Western Pacific, USA                                                                            | NOAA/ESRL/GMD/NIWA | 8 - 10                      | 2005 - 2013      | 242          | ship     |

NOAA/ESRL/GMD/HATS Trace Gas Measurements from Airborne Platforms, including the NASA campaigns AV-DEMO, AVE-05, CR-AVE, TC4 START-08, HIPPO, GLOPAC, ATTREX, ATOM, POSIDON

<sup>a</sup> The altitude specifies the sampling height in meters above sea level.

**Table S5.** Organizations and international observation networks and programs that provided measurement data, and their respective acronyms

| Abbreviation | Organization / Program                                                                                                      |
|--------------|-----------------------------------------------------------------------------------------------------------------------------|
| AEMET        | Agencia Estatal de Meteorología (State Meteorological Agency, Spain)                                                        |
| AGAGE        | Advanced Global Atmospheric Gases Experiment                                                                                |
| CSIRO        | Commonwealth Scientific and Industrial Research Organisation (Australia)                                                    |
| EAS          | School of Earth and Atmospheric Sciences, Georgia Institute of Technology (USA)                                             |
| EMPA         | Eidgenössische Materialprüfungs- und Forschungsanstalt<br>(Swiss Federal Laboratories for Materials Science and Technology) |
| INPE         | Instituto Nacional de Pesquisas Espaciais (Brazil)                                                                          |
| KIT          | Karlsruhe Institute of Technology (Germany)                                                                                 |
| KNU          | Kyungpook National University (South Korea)                                                                                 |
| MPI          | Max Planck Institute (Germany)                                                                                              |
| MPIC         | Max Planck Institute for Chemistry (Germany)                                                                                |
| MRI          | Meteorological Research Institute (Japan)                                                                                   |
| MUE          | Miyagi University of Education (Japan)                                                                                      |
| NIES         | National Institute for Environmental Studies (Japan)                                                                        |
| NILU         | Norwegian Institute for Air Research                                                                                        |
| NIPR         | National Institute of Polar Research (Japan)                                                                                |
| NIWA         | National Institute of Water and Atmospheric Research, New Zealand                                                           |
| NOAA         | National Oceanic and Atmospheric Administration (USA)                                                                       |
| CATS         | Chromatograph for Atmospheric Trace Species                                                                                 |
| CCAVPN       | Carbon Cycle Aircraft Vertical Profile Network                                                                              |
| CCGG         | Carbon Cycle Greenhouse Gases group                                                                                         |
| ESRL         | Earth System Research Laboratory                                                                                            |
| GGGRN        | Global Greenhouse Gas Reference Network                                                                                     |
| GMD          | Global Monitoring Division                                                                                                  |
| GML          | Global Monitoring Laboratory                                                                                                |
| HATS         | Halocarbons and other Atmospheric Trace Species                                                                             |
| SIO          | Scripps Institution of Oceanography (USA)                                                                                   |
| TU           | Tohoku University - Center for Atmospheric and Oceanic Studies                                                              |
| UBAG         | Umweltbundesamt (German Federal Environmental Agency)                                                                       |
| UNIURB       | Università degli Studi di Urbino "Carlo Bo" (University of Urbino, Italy)                                                   |
| UNIVBRIS     | University of Bristol (UK)                                                                                                  |

**Table S6.** Nudging kernel configuration used to run FLEXPART CTM

| <b>Nudging kernel configurations</b> |                                                       |                                   |                                                                |
|--------------------------------------|-------------------------------------------------------|-----------------------------------|----------------------------------------------------------------|
| kernel dimensions                    | surface stations                                      | ship measurements                 | aircraft measurements                                          |
| latitudinal kernel width $h_y$ [°]   | [1-25] <sup>a</sup>                                   | 10                                | $1 + 15 \cdot \arctan(\frac{\text{altitude}^b}{1000\text{m}})$ |
| longitudinal kernel width $h_x$ [°]  | same as $h_y$                                         | same as $h_y$                     | same as $h_y$                                                  |
| kernel height $h_z$ [m]              | 500 for $h_y > 5^\circ$<br>300 for $h_y \leq 5^\circ$ | 300                               | $20 \cdot \frac{h_y}{1^\circ}$                                 |
| temporal kernel length $h_t$ [s]     | $86400 \cdot \frac{h_y}{1^\circ}$                     | $86400 \cdot \frac{h_y}{1^\circ}$ | $86400 \cdot \frac{h_y}{1^\circ}$                              |
| kernel relaxation time $\tau$ [s]    | 1800                                                  | 1800                              | 1800                                                           |

<sup>a</sup>  $h_y$  depends on the standard deviation of measurements in a 3-day time interval for continuous measurements ( $h_y = 5^\circ \cdot \frac{0.08ppt}{std}$ ) and a 60-day time interval for flask measurements ( $h_y = 5^\circ \cdot \frac{0.15ppt}{std}$ )

<sup>b</sup> Altitude indicates the measurement altitude in meters above ground level.



**Table S7.** Statistical values comparing detrended modeled with detrended observed mole fractions at individual measurement stations, using EP7 as *a priori* emissions. The detrending was done, as for all stations the trend is so strong that very high correlation values of almost 100% would be obtained otherwise.

| measurement site | a priori $r^2$ [%] | a posteriori $r^2$ [%] | a priori MSE [1000 ppt <sup>2</sup> ] | a posteriori MSE [1000 ppt <sup>2</sup> ] |
|------------------|--------------------|------------------------|---------------------------------------|-------------------------------------------|
| bik              | 56                 | 60                     | 6.30                                  | 6.19                                      |
| brm              | 28                 | 37                     | 49.2                                  | 45.0                                      |
| brw              | 81                 | 81                     | 5.27                                  | 4.96                                      |
| bsd              | 53                 | 69                     | 6.57                                  | 4.18                                      |
| cgo              | 91                 | 91                     | 1.05                                  | 1.04                                      |
| cmn              | 40                 | 44                     | 43.7                                  | 37.8                                      |
| coi              | 41                 | 53                     | 20.9                                  | 18.2                                      |
| gsn              | 65                 | 81                     | 405                                   | 198                                       |
| hat              | 65                 | 83                     | 115                                   | 51                                        |
| hfd              | 60                 | 79                     | 21.00                                 | 9.58                                      |
| izo              | 50                 | 51                     | 4.72                                  | 4.63                                      |
| jfj              | 59                 | 62                     | 20.2                                  | 18.3                                      |
| mhd              | 92                 | 94                     | 2.72                                  | 2.11                                      |
| mlo              | 69                 | 69                     | 11.5                                  | 10.3                                      |
| nwr              | 84                 | 85                     | 10.02                                 | 8.42                                      |
| rgl              | 56                 | 72                     | 7.51                                  | 5.33                                      |
| rpb              | 96                 | 96                     | 2.07                                  | 2.03                                      |
| smo              | 93                 | 93                     | 3.70                                  | 3.65                                      |
| spo              | 77                 | 77                     | 3.06                                  | 3.06                                      |
| sum              | 43                 | 45                     | 5.25                                  | 5.02                                      |
| tac              | 76                 | 85                     | 17.8                                  | 11.0                                      |
| thd              | 62                 | 68                     | 3.87                                  | 2.60                                      |
| zep              | 97                 | 98                     | 2.27                                  | 1.64                                      |
| zsf              | 91                 | 93                     | 13.1                                  | 10.6                                      |

### S3 Measurement data sets

#### Observations from continuous surface stations

5 Table S1 lists all the surface stations continuously monitoring SF<sub>6</sub>. Measurements at CGO, JFJ, MHD, RPB, SMO, TAC, THD, and ZEP were provided by the international observation network AGAGE (Prinn et al., 2018). Data from BRW, MLO, NWR, SMO, SPO, and SUM were provided by the NOAA/GML Chromatograph for Atmospheric Trace Species (CATS) program (Dutton and Hall, 2023). Data from CMN (Maione et al., 2013), COI (Tohjima et al., 2002), IZO (Gomez-Pelaez and Ramos, 2009), RGL (Stavert et al., 2019), and ZSF (Zellweger et al., 2020) were found in the WDCGG data base <https://gaw.kishou.go.jp/search> (di Sarra et al., 2022). Observations from HFD (Arnold et al., 2019), BSD (O’Doherty et al., 2019) were found at the CEDA data base (CEDA, 2023), and measurements for ZEP (2005-2010) were found at the EBAS database (Tørseth et al., 2012). For the observations at BIK (Popa et al., 2010), BRM (Rust et al., 2022), GSN (Kim et al., 2012), and HAT (Saikawa et al., 2012) we refer to E. Popa <epopa2@yahoo.com>, S. Reinmann <stefan.reimann@empa.ch>, S. Park <sparky@knu.ac.kr>, and T. Saito <saito.takuya@nies.go.jp>, respectively.

#### 15 Surface flask measurements

Table S2 and S3 list all the surface flask measurement sampling sites. Measurements at ABP, ALT, AMT, AMY, ASC, ASK, AZR, BAL, BHD, BKT, BME, BMW, BRW, BSC, CBA, CGO, CHR, CIB, CPT, CRZ, DSI, EIC, GMI, HBA, HPB, HSU, HUN, ICE, IZO, KEY, KUM, KZD, KZM, LEF, LLB, LLN, LMP, MEX, MHD, MID, MKN, MLO, NAT, NMB, NWR, OXK, PAL, PSA, PTA, SDZ, SEY, SGP, SHM, SMO, SPO, STM, SUM, SYO, TAP, THD, TIK, TPI, USH, UTA, UUM, WIS, WKT, 20 WLG, ZEP were provided by the Atmospheric SF<sub>6</sub> Dry Air Mole Fractions from the NOAA GML Carbon Cycle Cooperative Global Air Sampling Network (Lan et al., 2023; Dlugokencky et al., 2020). For APB and NAT, INPE collected the samples, and the analysis was done together with NOAA/GML. NOAA Global Greenhouse Gas Reference Network provided flask-air PFP sample measurements of SF<sub>6</sub> at Tall Towers and other Continental Sites (Andrews et al., 2022) at BAO, CRV, HFM, KLM, LEF, LEW, MBO, MLO, MRC, MSH, MVY, MWO, NWB, NWR, SCT, SGP, STR, WBI, WGC, WKT. Measurements at ALT, 25 AMT, CGO, CRV, KUM, LEF, MHD, MLO, NWR, OBN, PCO, PSA, SPO, SUM, THD, USH were provided by NOAA ESRL Halocarbons and other Atmospheric Trace Species (HATS) (Elkins and Dutton, 2008; Hall et al., 2011) and were part of the NOAA ObsPACK SF<sub>6</sub> data set (NOAA Carbon Cycle Group ObsPack Team, 2018).

#### Measurements from moving platforms

Table S4 lists the measurements from moving platforms. AAO, ACG, ACT, BAO, BGI, BNE, CAR, CMA, CRV, DND, DRP, 30 ECO, ESP, ETL, FWI, HAA, HFM, HIL, INX, LEF, MCI, MRC, NHA, NSA, NSK, OIL, PFA, RTA, SCA, SGP, TGC, THD, ULB, WBI, WGC were provided by the Atmospheric Sulfur Hexafluoride Dry Air Mole Fractions from the NOAA GML Carbon Cycle Aircraft Vertical Profile Network (McKain et al., 2022). Observations at AOC, BII, CON, CRS, DRP, FAM, PAO, POC, SYO, WPC are part of NOAA ObsPACK SF<sub>6</sub> data set (NOAA Carbon Cycle Group ObsPack Team, 2018).

Observations at SAN and PAN were provided by INPE (D'Amelio et al., 2024). IAGOS-CARIBIC Aircraft measurements were provided by Schuck and Obersteiner (2024). NOAA/ESRL/GMD/HATS Trace Gas Measurements from Airborne Platforms (Elkins et al., 2020) provide observations from NASA aircraft measurement campaigns including UAV-DEMO (ALTAIR) (Fahey et al., 2006), AVE-05 (WB57) (Petropavlovskikh et al., 2008), CR-AVE (WB57) (Gensch et al., 2008), TC4 (WB57) (Salawitch et al., 2008), START-08 (GV) (Schauffler et al., 2010), HIPPO (GV) (Wofsy, 2011), GLOPAC (GHAWK) (Newman et al., 2010), ATTREX (GHAWK) (Jensen et al., 2013), ATOM (DC8) (Wofsy et al., 2018), POSIDON (WB57) (Jensen et al., 2020).

#### S4 Standardization of observations

The measurements from different providers were calibrated with four calibration scales: NIES-2008, WMO-SF<sub>6</sub>-X2006, WMO-SF<sub>6</sub>-X2014 and SIO-2005. We standardized all observations to the SIO-2005 calibration scale. To convert from WMO-SF<sub>6</sub>-X2014 to SIO-2005 scale, we divided by the factor of 1.002 presented in Guillevic et al. (2018). Note, however, that while according to Krummel et al. (2017), this factor seems appropriate for observations after 2010, it might be too low for earlier data and a factor of 1.008 would have been more appropriate. As the difference is, however, smaller than 1% we expect the impact on our inversion results to be negligible. For future applications, we recommend getting in contact with Paul Krummel <paul.krummel@csiro.au>. To convert the mole fractions from WMO-SF<sub>6</sub>-X2006 to WMO-SF<sub>6</sub>-X2014, we used the equation  $y = ax^2 + bx + c$ , where  $y$  represents the SF<sub>6</sub> mole fractions on the X2014 scale,  $x$  represents the mole fractions on the X2006 scale, and the coefficients  $a$ ,  $b$ , and  $c$  have values of  $2.6821 \cdot 10^{-3}$ ,  $9.7748 \cdot 10^{-1}$ , and  $3.5831 \cdot 10^{-2}$  (NOAA ESRL, 2014), respectively. The NIES-2008 calibrated data were divided by a factor of 1.013 (Saito, 2021).

#### S5 The initialization of FLEXPART CTM

SF<sub>6</sub> emissions are higher in the Northern than in the Southern Hemisphere, resulting in a substantial latitudinal gradient of SF<sub>6</sub> mole fractions. To address this in the initialization of the FLEXPART CTM, we provide a latitudinal SF<sub>6</sub> profile determined by interpolation of surface measurements in the first two weeks of the initialization. FLEXPART CTM disperses particles globally in proportion to air density, and according to the provided latitudinal profile. The SF<sub>6</sub> concentration in the stratosphere is influenced by the age of stratospheric air (AoA), defined as the average transport time of an air parcel from its entry into the stratosphere to any point within it (Waugh and Hall, 2002; Loeffel et al., 2022). Regions with high AoA have lower SF<sub>6</sub> concentrations, as they represent the lower tropospheric concentrations in the past, when the corresponding air left the troposphere. To address this, we use the MIPAS 3d AoA fields (Stiller et al., 2021) along with the average global concentrations calculated by Simmonds et al. (2020) to correct the initial concentration fields in the stratosphere. In detail, we calculate a 3d field of correction factors, by building the ratio between the SF<sub>6</sub> concentration at the initialization time and the concentration at the time given by the respective AoA value. Figure S28 shows the initial mole fraction field for 2005.

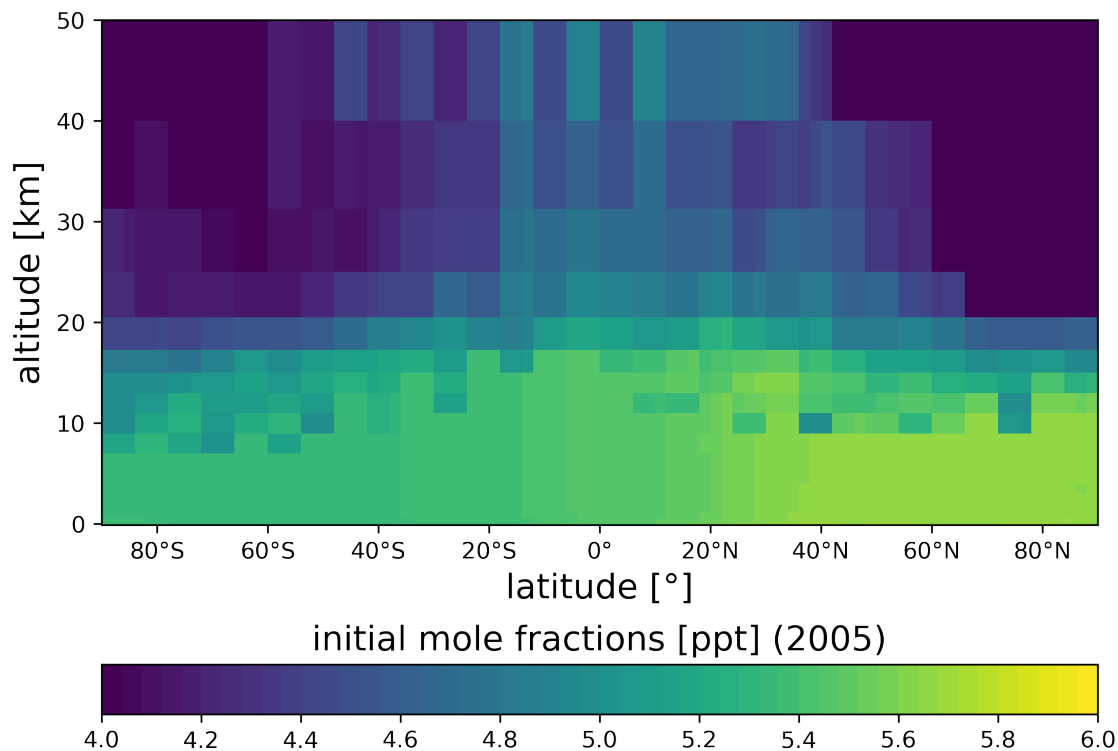

**Figure S28.** Initial field of SF<sub>6</sub> mole fractions used for the initialization in the year 2005.

### S6 SF<sub>6</sub> emission in the GAINS model

65 SF<sub>6</sub> emissions originate from various sources such as mid- and high-voltage switches, magnesium production and casting, soundproof glazing, and a range of other applications including photovoltaic manufacturing, military applications, biomedical industry, fiber optic production, particle accelerators, and sports equipment. Within the GAINS model, four distinct sources of SF<sub>6</sub> emissions have been identified as follows:

#### High and mid voltage switches

70 SF<sub>6</sub> emissions primarily originate from the electrical equipment sector due to leakage, maintenance, and retirement (IPCC/TEAP, 2005). SF<sub>6</sub> functions as an electrical insulator in transmission and distribution equipment in electric systems, primarily within gas-insulated switch gears (GIS) employed in high and mid-voltage electric networks. Emission levels of SF<sub>6</sub> are affected by factors like the age of GIS, with older models exhibiting higher leakage rates than newer ones, and the size of the transmission network, as well as the recycling practices of obsolete equipment (Purohit and Höglund-Isaksson, 2017; Gambhir et al., 2017).

75 In this study, the GAINS model utilizes reported emissions for Annex-I countries from the years 2005, 2010, 2015, and 2020, as documented by UNFCCC (2023). For the historical years, SF<sub>6</sub> emissions in China are taken from Zhou et al. (2018) and Cui

et al. (2024). The GAINS model uses electricity generation as an activity variable for this sector. For other non-Annex-I (developing) countries, the emission factor for SF<sub>6</sub> per unit of electricity generated is taken from the average of Annex-I countries (UNFCCC, 2023) and applied in a consistent manner to all regions. In recent years, several alternatives to SF<sub>6</sub> in both mid- and high-voltage electrical switch gear were developed. The GAINS model incorporated alternative substitutes for SF<sub>6</sub> in mid- and high-voltage electrical switch gear, including zero-GWP AIR, NOVEC-4710 with a GWP100 of 2100, and NOVEC-5110 with a GWP100 of 1 (Gschrey et al., 2022; Owens et al., 2021). Additionally, emissions can be reduced through recycling practices for used SF<sub>6</sub> switch gears, as mandated by F-gas Regulation (EC 842/2006) since 2010.

### **Magnesium production and casting**

The casting and production of primary and secondary magnesium are recognized as significant sources of SF<sub>6</sub> atmospheric emissions. The gas is used as a shielding gas in magnesium foundries to protect the molten magnesium from reoxidizing whilst it is running to best casting ingots (IPCC, 2001). In this study, the GAINS model utilizes reported emissions for EU countries from the years 2005, 2010, 2015, and 2020 (UNFCCC, 2023). Activity data for non-EU countries on historic volumes of processed magnesium are taken from the United States Geological Survey (USGS, 2023) and the national communications to UNFCCC (UNFCCC, 2023). The GAINS model uses value added for the manufacturing industry as an activity variable for this sector. An emission factor of 1 kg SF<sub>6</sub> per ton of processed metal is taken from Schwarz and Leisewitz (1999) and Tohka (2005). According to Fang et al. (2013), SF<sub>6</sub> consumption factor of 1.65 kg SF<sub>6</sub> per ton of magnesium is employed specifically for magnesium processing in China. While the 2006 EU F-gas regulation only restricted SF<sub>6</sub> usage in die-casting operations, the bans on SF<sub>6</sub> usage in recycling magnesium die-casting alloys were introduced in the 2014 EU F-gas regulation (DEFRA, 2014). In the GAINS model, SF<sub>6</sub> emissions from magnesium production and casting can be substituted by using sulfur dioxide or the recently introduced sustainable cover gas NOVEC-612, which has a GWP100 of 1.

### **Soundproof windows**

Some European countries used significant amounts of SF<sub>6</sub> in soundproof windows. From 2006, EC 842/2006 bans the use of SF<sub>6</sub> in soundproof windows. Soundproof windows have a relatively long lifetime, and it is therefore expected that the stock of SF<sub>6</sub> found in such windows in 2005 will be successively phased-out over a period of 25 years. The GAINS methodology to assess SF<sub>6</sub> emissions in soundproof windows is outlined in Purohit and Höglund-Isaksson (2017).

### **Other SF<sub>6</sub> sources**

SF<sub>6</sub> has been used in several other applications including PV manufacturing, military applications, biomedical industry, fiber optic production, particle accelerators, and sports equipment. Activity data for these other sources of SF<sub>6</sub> emissions are taken from emissions reported by countries to the (UNFCCC, 2023). Since 2006, EC 842/2006 has banned SF<sub>6</sub> in sports equipment and tires, with GAINS assuming full EU compliance.

## Spatial distribution

The spatial distribution of SF<sub>6</sub> emissions in Europe (EU27, Iceland, Norway, Switzerland, United Kingdom of Great Britain and Northern Ireland) follows 4081 electrical substation locations, based on ENTSO-E data from Wiegmans (2016). In absence of more detailed information about substation characteristics, an equal distribution among substations in each country was chosen and individual locations aggregated at 0.1° resolution. For the remaining regions differentiated in the GAINS model, emissions are allocated using a gridded population proxy from the Gridded Population of the World (GPW) Doxsey-Whitfield et al. (2015) and Global Human Settlement Layer (GHSL) (EC-JRC, 2015). The gridded population data is processed at its highest initial resolution, spatially allocated to a region, and aggregated to the output resolution (0.1° in this case). The distribution of emissions is subsequently based on the relative population share within a region.

## S7 Sensitivity tests

Here we show a selection of 7 sensitivity tests including different inversion settings regarding *a priori* emission uncertainties and baseline optimization.

**Table S8.** Settings of the shown sensitivity tests

| sensitivity test | Emissions uncertainty [%] | Minimal emission uncertainty [ $\frac{kg}{m^2h}$ ] | Baseline optimization | Baseline uncertainty [ppt] |
|------------------|---------------------------|----------------------------------------------------|-----------------------|----------------------------|
| st_1             | 50                        | $5 \cdot 10^{-14}$                                 | yes                   | 0.15                       |
| st_2             | 100                       | $5 \cdot 10^{-14}$                                 | yes                   | 0.15                       |
| st_3             | 70                        | $5 \cdot 10^{-13}$                                 | yes                   | 0.15                       |
| st_4             | 70                        | $5 \cdot 10^{-14}$                                 | yes                   | 0.15                       |
| st_5             | 70                        | $5 \cdot 10^{-14}$                                 | yes                   | 0.05                       |
| st_6             | 70                        | $5 \cdot 10^{-14}$                                 | yes                   | 0.25                       |
| st_7             | 70                        | $5 \cdot 10^{-14}$                                 | no                    | -                          |

For these different sensitivity tests, we show the *a posteriori* emissions in the U.S., China, and Australia using the E7N *a priori* inventory. Inversion results are relatively stable under the tested conditions. For the U.S. (Fig. S29) and China (Fig. S30) the variation of *a priori* emission uncertainties between 50% and 100% of the respective *a priori* values (st\_1, st\_2, st\_4) did not have a large effect. Increasing the minimum value of the *a priori* uncertainty (st\_3) did not lead to differences in case of the large emitters U.S. and China, however, resulted in large inter-annual changes in the Australian *a posteriori* emissions and in large *a posteriori* uncertainty bands (Fig. S31). Waving the option of optimizing the baseline (st\_7) resulted overall in the biggest differences in case of the U.S. and Chinese *a posteriori* emissions (Fig. S29 and Fig. S30) among the shown sensitivity tests, underlining the importance of the baseline for inversions. However, differences are small compared to the use of different *a priori* inventories. The variation of the baseline uncertainty (st\_5, st\_6) showed only small effects on the inversion results.

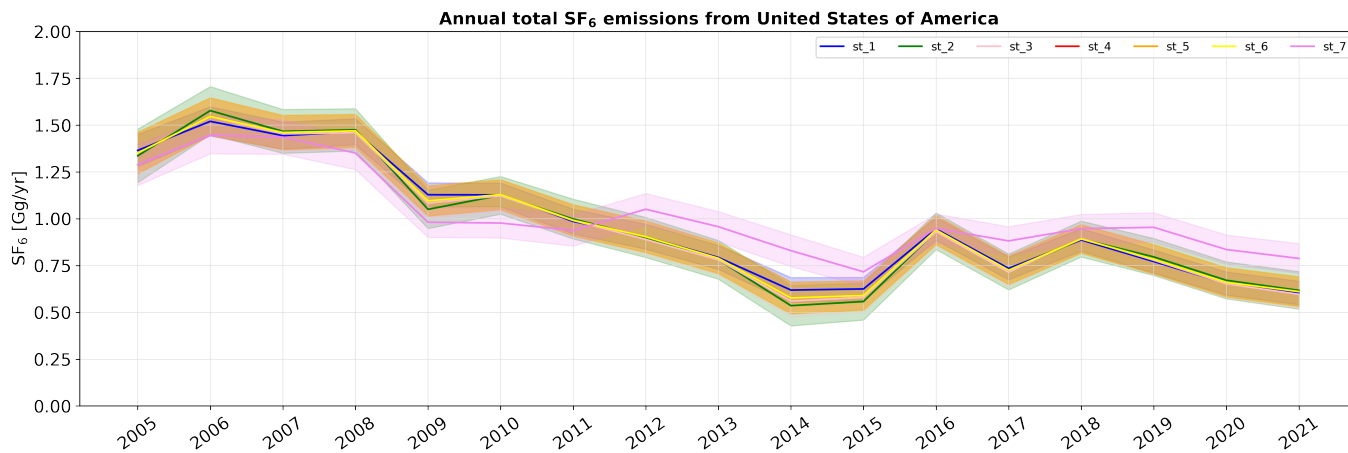

**Figure S29.** Annual *a posteriori* SF<sub>6</sub> emissions in the U.S. for the period between 2005 and 2021 when using the different inversion settings in Table S8, shown together with their respective 1- $\sigma$  uncertainties (colored shadings).

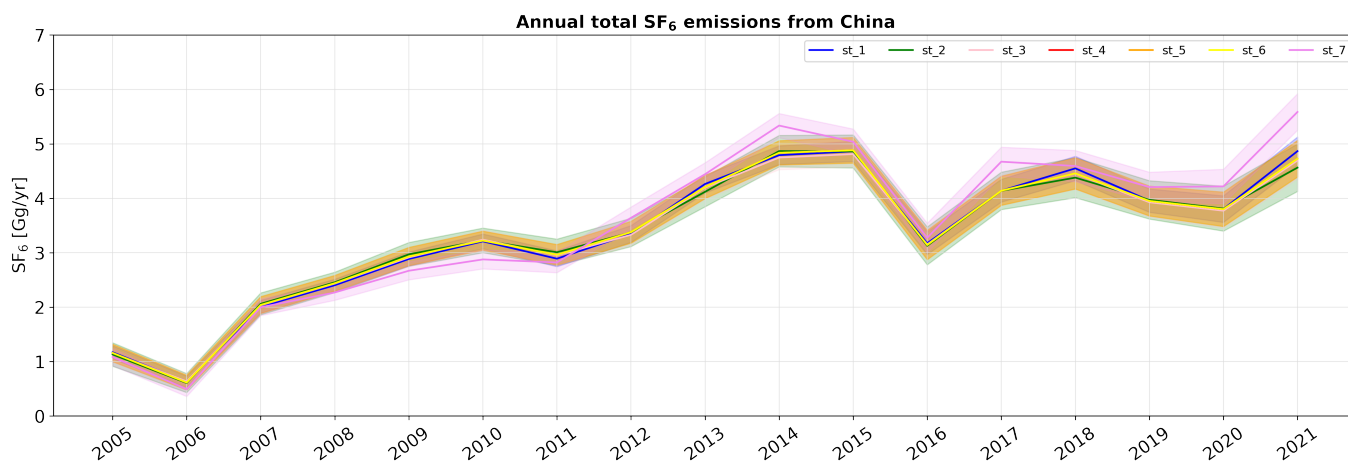

**Figure S30.** Annual *a posteriori* SF<sub>6</sub> emissions in China for the period between 2005 and 2021 when using the different inversion settings in Table S8, shown together with their respective 1- $\sigma$  uncertainties (colored shadings).

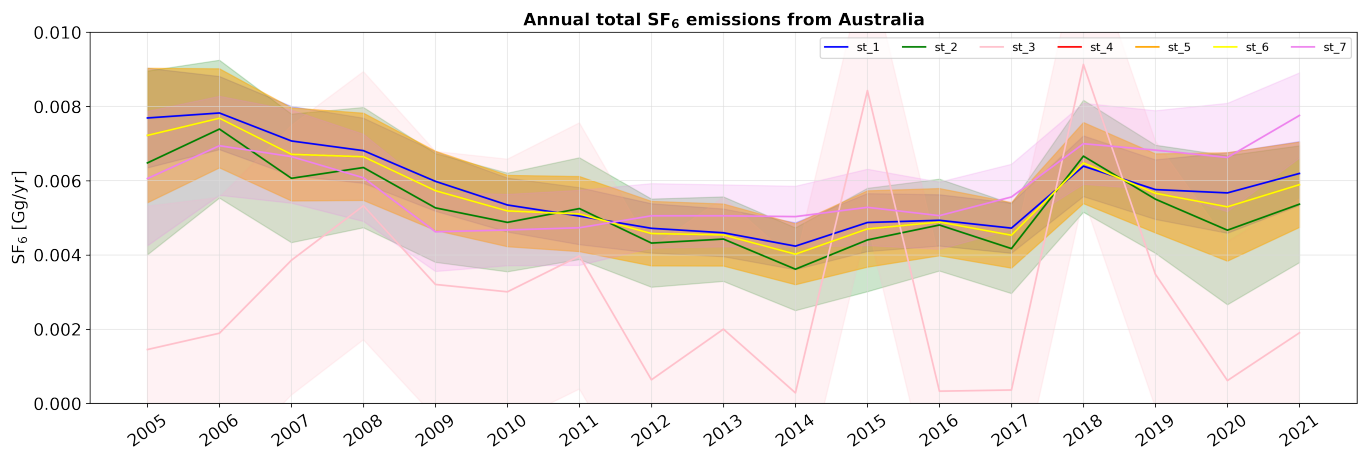

**Figure S31.** Annual *a posteriori* SF<sub>6</sub> emissions in Australia for the period between 2005 and 2021 when using the different inversion settings in Table S8, shown together with their respective 1- $\sigma$  uncertainties (colored shadings).



## References

- Andrews, A., Crotwell, A., Crotwell, M., Handley, P., Higgs, J., Kofler, J., Lan, X., Legard, T., Madronich, M., McKain, K., Miller, J.,  
130 Moglia, E., Mund, J., Neff, D., Newberger, T., Petron, G., Turnbull, J., Vimont, I., Wolter, S., and NOAA Global Monitoring Laboratory:  
NOAA Global Greenhouse Gas Reference Network Flask-Air PFP Sample Measurements of SF<sub>6</sub> at Tall Tower and other Continental  
Sites, 2005-Present [Data set]., Version: 2022-11-01., NOAA GML., <https://doi.org/10.15138/5R14-K382>, 2022.
- Arnold, T., Rennick, C., O'Doherty, S., Say, D., Young, D., Stavert, A., and Wenger, A.: Deriving Emissions related to Climate Change  
Network: CO<sub>2</sub>, CH<sub>4</sub>, N<sub>2</sub>O, SF<sub>6</sub> and CO measurements from Heathfield Tall Tower, East Sussex. Centre for Environmental Data Analysis,  
135 <https://catalogue.ceda.ac.uk/uuid/df502fe4715c4177ab5e4e367a99316b>, last accessed: 2024-02-1, 2019.
- CEDA: World Data Centre for Greenhouse Gases, <https://archive.ceda.ac.uk/>, last accessed: 2023-09-10, 2023.
- Cui, Z., Li, Y., Xiao, S., Tian, S., Tang, J., Hao, Y., and Zhang, X.: Recent progresses, challenges and proposals on SF<sub>6</sub> emission reduction  
approaches, *Science of The Total Environment*, p. 167347, <https://doi.org/10.1016/j.scitotenv.2023.167347>, 2024.
- DEFRA: Magnesium smelting: bans on use of sulphur hexafluoride. Department for Environment, Food Rural Affairs and Environ-  
140 ment Agency (DEFRA), UK, December, <https://www.gov.uk/guidance/magnesium-smelting-bans-on-use-of-sulphur-hexafluoride>, last  
accessed: 2024-02-15, 2014.
- di Sarra, A., Hall, B. D., Dylag, C., Couret, C., Lunder, C., Sweeney, C., Sferlazzo, D., Say, D., Mondeel, D. J., Young, D., Dlugo-  
kencky, E., Cuevas, E., Meinhardt, F., Technos, G. E., Dutton, G. S., Lee, H., Nance, J. D., Arduini, J., Pitt, J., Tsuboi, K., Stanley,  
K., Gatti, L. V., Steinbacher, M., Vollmer, M., Krummel, P., Rivas, P., Weiss, R. F., Wang, R., Chiavarini, S., Piacentino, S., O'Doherty, S.,  
145 Reimann, S., A. Montzka, S., Saito, T., and Lan, X.: All SF<sub>6</sub> data contributed to WDCGG by GAW stations and mobiles by 2022-09-05,  
[https://doi.org/10.50849/WDCGG\\_SF6\\_ALL\\_2022](https://doi.org/10.50849/WDCGG_SF6_ALL_2022), 2022.
- Dlugokencky, E., Crotwell, A., Mund, J., Crotwell, M., and Thoning, K.: Atmospheric Sulfur Hexafluoride Dry Air Mole Fractions from  
the NOAA GML Carbon Cycle Cooperative Global Air Sampling Network, 1997-2019, Version: 2020-07, [https://doi.org/10.15138/p646-  
pa37](https://doi.org/10.15138/p646-pa37), 2020.
- 150 Doxsey-Whitfield, E., MacManus, K., Adamo, S. B., Pistolesi, L., Squires, J., Borkovska, O., and Baptista, S. R.: Taking advantage of the  
improved availability of census data: a first look at the gridded population of the world, version 4, *Papers in Applied Geography*, 1,  
226–234, <https://doi.org/10.1080/23754931.2015.1014272>, 2015.
- Dutton, G. and Hall, B.: Global Atmospheric Sulfur hexafluoride Dry Air Mole Fractions from the NOAA GML Halocarbons in situ Network,  
1998-2023, Version: 2023-04-13, <https://doi.org/10.7289/V5X0659V>, 2023.
- 155 D'Amelio, M. T., Gatti, L. V., Martins, E. A. J., Polakiewicz, L., Miller, J., Crotwell, A., and Tans, P.: Green-  
house gases study in the Amazonia atmosphere, [https://www.researchgate.net/profile/Luciana-Gatti/publication/  
242072841\\_GREENHOUSE\\_GASES\\_STUDY\\_IN\\_THE\\_AMAZONIA\\_ATMOSPHERE/links/0f3175375e48855b32000000/  
GREENHOUSE-GASES-STUDY-IN-THE-AMAZONIA-ATMOSPHERE.pdf](https://www.researchgate.net/profile/Luciana-Gatti/publication/242072841_GREENHOUSE_GASES_STUDY_IN_THE_AMAZONIA_ATMOSPHERE/links/0f3175375e48855b32000000/GREENHOUSE-GASES-STUDY-IN-THE-AMAZONIA-ATMOSPHERE.pdf), last accessed: 2024-02-01, 2024.
- EC-JRC: GHS-POP R2015A - GHS population grid, derived from GPW4, multitemporal (1975, 1990, 2000, 2015). European Commission,  
160 Joint Research Centre (JRC) [Dataset] PID:, [http://data.europa.eu/89h/jrc-ghsl-ghs\\_pop\\_gpw4\\_globe\\_r2015a](http://data.europa.eu/89h/jrc-ghsl-ghs_pop_gpw4_globe_r2015a), 2015.
- Elkins, J. and Dutton, G.: Nitrous oxide and sulfur hexafluoride [in 'State of the Climate in 2008']. *Bull. Amer. Meteor. Soc.*, 90 S38-S39,  
2008.
- Elkins, J. W., Moore, F., Hints, E., Hurst, D., Hall, B., Montzka, S., Miller, B., Dutton, G., and Nance, D.: HATS Airborne Projects,  
[www.esrl.noaa.gov/gmd/hats/airborne/](http://www.esrl.noaa.gov/gmd/hats/airborne/), last accessed: 2024-02-1, 2020.

- 165 Fahey, D. W., Churnside, J. H., Elkins, J. W., Gasiewski, A. J., Rosenlof, K. H., Summers, S., Aslaksen, M., Jacobs, T. A., Sellars, J. D., Jennison, C. D., et al.: Altair unmanned aircraft system achieves demonstration goals, *Eos, Transactions American Geophysical Union*, 87, 197–201, <https://doi.org/10.1029/2006EO200002>, 2006.
- Fang, X., Hu, X., Janssens-Maenhout, G., Wu, J., Han, J., Su, S., Zhang, J., and Hu, J.: Sulfur hexafluoride (SF<sub>6</sub>) emission estimates for China: an inventory for 1990–2010 and a projection to 2020, *Environmental science & technology*, 47, 3848–3855, <https://doi.org/10.1021/es304348x>, 2013.
- 170 Gambhir, A., Napp, T., Hawkes, A., Höglund-Isaksson, L., Winiwarter, W., Purohit, P., Wagner, F., Bernie, D., and Lowe, J.: The contribution of non-CO<sub>2</sub> greenhouse gas mitigation to achieving long-term temperature goals, *Energies*, 10, 602, <https://doi.org/10.3390/en10050602>, 2017.
- Gensch, I. V., Bunz, H., Baumgardner, D., Christensen, L. E., Fahey, D. W., Herman, R. L., Popp, P. J., Smith, J. B., Troy, R. F., Webster, C. R.,  
175 et al.: Supersaturations, microphysics and nitric acid partitioning in a cold cirrus cloud observed during CR-AVE 2006: an observation–modelling intercomparison study, *Environmental research letters*, 3, 035 003, <https://doi.org/10.1088/1748-9326/3/3/035003>, 2008.
- Gomez-Pelaez, A. and Ramos, R.: 4.1 Installation of a New Gas Chromatograph at Izaña GAW Station (Spain) to Measure CH<sub>4</sub>, N<sub>2</sub>O, and SF<sub>6</sub>, GAW Report No. 186, p. 55, <https://citeseerx.ist.psu.edu/document?repid=rep1&type=pdf&doi=0f54fc63d0aaa54c6146cba55cc0ba7bbfbad00f#page=73>, 2009.
- 180 Gschrey, B., Behringer, D., Kleinschmidt, J., Jörß, W., Liste, V. ., Ludig, S., Wissner, N., Birchby, D., Dubey, J., and Hekman, J.: Support contract for an Evaluation and Impact Assessment for amending Regulation (EU) No 517/2014 on fluorinated greenhouse gases, CLIMA.A2/ETU/2019/0016, Impact Assessment Final Report, March, 2022.
- Guillevic, M., Vollmer, M. K., Wyss, S. A., Leuenberger, D., Ackermann, A., Pascale, C., Niederhauser, B., and Reimann, S.: Dynamic–gravimetric preparation of metrologically traceable primary calibration standards for halogenated greenhouse gases, *Atmospheric  
185 Measurement Techniques*, 11, 3351–3372, <https://doi.org/10.5194/amt-11-3351-2018>, 2018.
- Hall, B., Dutton, G., Mondeel, D., Nance, J., Rigby, M., Butler, J., Moore, F., Hurst, D., and Elkins, J.: Improving measurements of SF<sub>6</sub> for the study of atmospheric transport and emissions, *Atmospheric Measurement Techniques*, 4, 2441–2451, <https://doi.org/10.5194/amt-4-2441-2011>, 2011.
- IPCC/TEAP: IPCC/TEAP Special Report on Safeguarding the Ozone Layer and the Global Climate System: Issues Related to Hydrofluorocarbons and Perfluorocarbons, Intergovernmental Panel on Climate Change (IPCC) and Technology and Economic Assessment Panel (TEAP), Cambridge University Press, Cambridge, United Kingdom and New York, USA, 2005.
- 190 Jensen, E., Pan, L. L., Honomichl, S., Diskin, G. S., Krämer, M., Spelten, N., Günther, G., Hurst, D. F., Fujiwara, M., Vömel, H., et al.: Assessment of observational evidence for direct convective hydration of the lower stratosphere, *Journal of Geophysical Research: Atmospheres*, 125, e2020JD032 793, <https://doi.org/10.1029/2020JD032793>, 2020.
- 195 Jensen, E. J., Pfister, L., Jordan, D. E., Fahey, D. W., Newman, P. A., Thornberry, T., Rollins, A., Diskin, G., Bui, T. P., McGill, M., et al.: The NASA Airborne Tropical Tropopause EXperiment (ATTREX), *SPARC Newsletter*, 41, 15–24, 2013.
- Kim, J., Li, S., Mühle, J., Stohl, A., Kim, S.-K., Park, S., Park, M.-K., Weiss, R. F., and Kim, K.-R.: Overview of the findings from measurements of halogenated compounds at Gosan (Jeju Island, Korea) quantifying emissions in East Asia, *Journal of Integrative Environmental Sciences*, 9, 71–80, <https://doi.org/10.1080/1943815X.2012.696548>, 2012.
- 200 Krummel, P., Montzka, S., Harth, C., Miller, B., Mühle, J., Dlugokencky, E., Salameh, P., Hall, B., O’Doherty, S., Steele, L., Dutton, G., Young, D., Nance, J., Langenfelds, R., Elkins, J., Loh, Z., Lunder, C., Fraser, P., Derek, N., Mitrevski, B., Weiss, R., and Prinn, R.: An update of comparisons of non-CO<sub>2</sub> trace gas measurements between AGAGE and NOAA at common sites, Presenta-

- tion at the 19th WMO/IAEA GGMT Meeting, 28-31 Aug 2017, Empa, Dübendorf, Switzerland, <https://community.wmo.int/en/meetings/19th-wmoiaea-meeting-carbon-dioxide-other-greenhouse-gases-and-related-measurement-techniques-ggmt-2017>, last accessed: 2024-02-01, 2017.
- 205 Lan, X., Mund, J., Crotwell, A., Crotwell, M., Moglia, E., Madronich, M., Neff, D., and Thoning, K.: Atmospheric Sulfur Hexafluoride Dry Air Mole Fractions from the NOAA GML Carbon Cycle Cooperative Global Air Sampling Network, 1997-2022, Version: 2023-08-28, <https://doi.org/10.15138/p646-pa37>, 2023.
- Loeffel, S., Eichinger, R., Garny, H., Reddmann, T., Fritsch, F., Versick, S., Stiller, G., and Haenel, F.: The impact of sulfur hexafluoride (SF<sub>6</sub>) sinks on age of air climatologies and trends, *Atmospheric Chemistry and Physics*, 22, 1175–1193, <https://doi.org/10.5194/acp-22-1175-2022>, 2022.
- 210 Maione, M., Giostra, U., Arduini, J., Furlani, F., Graziosi, F., Vullo, E. L., and Bonasoni, P.: Ten years of continuous observations of stratospheric ozone depleting gases at Monte Cimone (Italy)—Comments on the effectiveness of the Montreal Protocol from a regional perspective, *Science of the total environment*, 445, 155–164, <https://doi.org/10.1016/j.scitotenv.2012.12.056>, 2013.
- 215 McKain, K., Sweeney, C., Baier, B., Crotwell, A., Crotwell, M., Handley, P., Higgs, J., Legard, T. and Madronich, M., Miller, J. B., Moglia, E. and Mund, J. N. D., Newberger, T., Wolter, S., and Laboratory, N. G. M.: NOAA Global Greenhouse Gas Reference Network Flask-Air PFP Sample Measurements of CO<sub>2</sub>, CH<sub>4</sub>, CO, N<sub>2</sub>O, H<sub>2</sub>, SF<sub>6</sub> and isotopic ratios collected from aircraft vertical profiles [Data set]. Version: 2022-12-01, <https://doi.org/10.15138/39HR-9N34>, 2022.
- Newman, P., Fahey, D., and Global Hawk Pacific Experiment Science Team and others: The Global Hawk Pacific Mission (April-May, 2010), in: AGU Fall Meeting Abstracts, vol. 2010, pp. A53H–08, 2010.
- 220 NOAA Carbon Cycle Group ObsPack Team: Multi-laboratory compilation of atmospheric sulfure hexafluoride data for the period 1983-2017; obspacksf61v2.1.12018–08–17; NOAA Earth System Research Laboratory, Global Monitoring Division, <https://doi.org/10.15138/g3ks7p>, 2018.
- NOAA ESRL: NOAA Earth System Research Laboratory: Sulfur Hexafluoride (SF<sub>6</sub>) WMO Scale, [https://gml.noaa.gov/ccl/sf6\\_scale.html](https://gml.noaa.gov/ccl/sf6_scale.html), last accessed: 2022-05-27, 2014.
- 225 O’Doherty, S., Say, D., Stanley, K., Young, D., Pitt, J., and Wenger, A.: Deriving Emissions related to Climate Change Network: CO<sub>2</sub>, CH<sub>4</sub>, N<sub>2</sub>O, SF<sub>6</sub> and CO measurements from Bilsdale Tall Tower, North York Moors National Park. Centre for Environmental Data Analysis, <https://catalogue.ceda.ac.uk/uuid/d2090552c8fe4c16a2fd7d616adc2d9f>, last accessed: 2024-02-1, 2019.
- Owens, J., Xiao, A., Bonk, J., DeLorme, M., and Zhang, A.: Recent development of two alternative gases to SF<sub>6</sub> for high voltage electrical power applications, *Energies*, 14, 5051, <https://doi.org/10.3390/en14165051>, 2021.
- 230 Petropavlovskikh, I., Froidevaux, L., Shetter, R., Hall, S., Ullmann, K., Bhartia, P., Kroon, M., and Levelt, P.: In-flight validation of Aura MLS ozone with CAFS partial ozone columns, *Journal of Geophysical Research: Atmospheres*, 113, <https://doi.org/10.1029/2007JD008690>, 2008.
- Popa, M., Gloor, M., Manning, A., Jordan, A., Schultz, U., Haensel, F., Seifert, T., and Heimann, M.: Measurements of greenhouse gases and related tracers at Bialystok tall tower station in Poland, *Atmospheric Measurement Techniques*, 3, 407–427, <https://doi.org/10.5194/amt-3-407-2010>, 2010.
- 235 Prinn, R. G., Weiss, R. F., Arduini, J., Arnold, T., DeWitt, H. L., Fraser, P. J., Ganesan, A. L., Gasore, J., Harth, C. M., Hermansen, O., Kim, J., Krummel, P. B., Li, S., Loh, Z. M., Lunder, C. R., Maione, M., Manning, A. J., Miller, B. R., Mitrevski, B., Mühle, J., O’Doherty, S., Park, S., Reimann, S., Rigby, M., Saito, T., Salameh, P. K., Schmidt, R., Simmonds, P. G., Steele, L. P., Vollmer, M. K., Wang, R. H., Yao,

- 240 B., Yokouchi, Y., Young, D., and Zhou, L.: History of chemically and radiatively important atmospheric gases from the Advanced Global Atmospheric Gases Experiment (AGAGE), *Earth System Science Data*, 10, 985–1018, <https://doi.org/10.5194/essd-10-985-2018>, 2018.
- Purohit, P. and Höglund-Isaksson, L.: Global emissions of fluorinated greenhouse gases 2005–2050 with abatement potentials and costs, *Atmospheric Chemistry and Physics*, 17, 2795–2816, <https://doi.org/10.5194/acp-17-2795-2017>, 2017.
- Rust, D., Katharopoulos, I., Vollmer, M. K., Henne, S., O’Doherty, S., Say, D., Emmenegger, L., Zenobi, R., and Reimann, S.: Swiss halocar-  
245 bon emissions for 2019 to 2020 assessed from regional atmospheric observations, *Atmospheric Chemistry and Physics*, 22, 2447–2466, <https://doi.org/10.5194/acp-22-2447-2022>, 2022.
- Saikawa, E., Rigby, M., Prinn, R. G., Montzka, S. A., Miller, B. R., Kuijpers, L. J. M., Fraser, P. J. B., Vollmer, M. K., Saito, T., Yokouchi, Y., Harth, C. M., Mühle, J., Weiss, R. F., Salameh, P. K., Kim, J., Li, S., Park, S., Kim, K.-R., Young, D., O’Doherty, S., Simmonds, P. G., McCulloch, A., Krummel, P. B., Steele, L. P., Lunder, C., Hermansen, O., Maione, M., Arduini, J., Yao, B., Zhou, L. X., Wang, H. J.,  
250 Elkins, J. W., and Hall, B.: Global and regional emission estimates for HCFC-22, *Atmospheric Chemistry and Physics*, 12, 10 033–10 050, <https://doi.org/10.5194/acp-12-10033-2012>, 2012.
- Saito, T.: private communication, feb. 05, 2021.
- Salawitch, R., Canty, T., Avery, M., Wennberg, P., Team, T. S., et al.: Chemistry Observations from TC4: Overview, in: AGU Spring Meeting Abstracts, vol. 2008, pp. A53B–07, 2008.
- 255 Schauffler, S., Atlas, E., Lueb, R., Hendershot, R., and Pope, L.: Whole Air Sampler measurements of organic halogens in the troposphere and lower stratosphere from aircraft and balloon platforms., in: EGU General Assembly Conference Abstracts, p. 2991, 2010.
- Schuck, T. and Obersteiner, F.: IAGOS-CARIBIC whole air sampler data (2024.01.12) [Data set]. Zenodo., <https://doi.org/10.5281/zenodo.10495039>, 2024.
- Schwarz, W. and Leisewitz, A.: Emissions and reduction potentials of hydrofluorocarbons, perfluorocarbons and sulphur hexafluoride in  
260 Germany, Öko-Recherche, Frankfurt, Report for the German Federal Environmental Agency (Umweltbundesamt, UBA, Berlin), <https://www.oekorecherche.de/sites/default/files/publikationen/f-gases.pdf>, last accessed: 2024-02-15, 1999.
- Simmonds, P. G., Rigby, M., Manning, A. J., Park, S., Stanley, K. M., McCulloch, A., Henne, S., Graziosi, F., Maione, M., Arduini, J., Reimann, S., Vollmer, M. K., Mühle, J., O’Doherty, S., Young, D., Krummel, P. B., Fraser, P. J., Weiss, R. F., Salameh, P. K., Harth, C. M., Park, M.-K., Park, H., Arnold, T., Rennick, C., Steele, L. P., Mitrevski, B., Wang, R. H. J., and Prinn, R. G.: The In-  
265 creasing Atmospheric Burden of the Greenhouse Gas Sulfur Hexafluoride (SF<sub>6</sub>), *Atmospheric Chemistry and Physics*, 20, 7271–7290, <https://doi.org/10.5194/acp-20-7271-2020>, 2020.
- Stavert, A. R., O’Doherty, S., Stanley, K., Young, D., Manning, A. J., Lunt, M. F., Rennick, C., and Arnold, T.: UK greenhouse gas measurements at two new tall towers for aiding emissions verification, *Atmospheric Measurement Techniques*, 12, 4495–4518, <https://doi.org/10.5194/amt-12-4495-2019>, 2019.
- 270 Stiller, G., Harrison, J. J., Haenel, F., Glatthor, N., and Kellmann, S.: MIPAS monthly zonal mean Age of Air data, based on MIPAS SF<sub>6</sub> retrievals, processed at KIT-IMK, Karlsruhe, <https://doi.org/10.5445/IR/1000139453>, 2021.
- Tohjima, Y., Machida, T., Utiyama, M., Katsumoto, M., Fujinuma, Y., and Maksyutov, S.: Analysis and presentation of in situ atmospheric methane measurements from Cape Ochi-ishi and Hateruma Island, *Journal of Geophysical Research: Atmospheres*, 107, ACH–8, <https://doi.org/10.1029/2001JD001003>, 2002.
- 275 Tohka, A.: The GAINS Model for Greenhouse Gases – Version 1.0: HFC, PFC and SF<sub>6</sub>, International Institute for Applied Systems Analysis (IIASA), Laxenburg, Austria, October, 2005.

- Tørseth, K., Aas, W., Breivik, K., Fjæraa, A. M., Fiebig, M., Hjellbrekke, A.-G., Lund Myhre, C., Solberg, S., and Yttri, K. E.: Introduction to the European Monitoring and Evaluation Programme (EMEP) and observed atmospheric composition change during 1972–2009, *Atmospheric Chemistry and Physics*, 12, 5447–5481, <https://doi.org/10.5194/acp-12-5447-2012>, 2012.
- 280 UNFCCC: National Inventory Submissions 2023, <https://unfccc.int/ghg-inventories-annex-i-parties/2023>, 2023.
- USGS: Magnesium Statistics and Information, United States Geological Survey (USGS), <https://www.usgs.gov/centers/national-minerals-information-center/magnesium-statistics-and-information>, 2023.
- Waugh, D. and Hall, T.: Age of stratospheric air: Theory, observations, and models, *Reviews of Geophysics*, 40, 1–1, <https://doi.org/10.1029/2000RG000101>, 2002.
- 285 Wiegmans, B.: GridKit extract of ENTSO-E interactive map, Zenodo: Oldenburg, Germany, <https://doi.org/10.5281/zenodo.55853>, 2016.
- Wofsy, S., Afshar, S., Allen, H., Apel, E., Asher, E., Barletta, B., Bent, J., Bian, H., Biggs, B., Blake, D., et al.: ATom: Merged atmospheric chemistry, trace gases, and aerosols, ORNL DAAC, Oak Ridge, Tennessee, USA, <https://doi.org/10.3334/ORNLDAAC/1581>, 2018.
- Wofsy, S. C.: HIAPER Pole-to-Pole Observations (HIPPO): fine-grained, global-scale measurements of climatically important atmospheric gases and aerosols, *Philosophical Transactions of the Royal Society A: Mathematical, Physical and Engineering Sciences*, 369, 2073–
- 290 2086, <https://doi.org/10.1098/rsta.2010.0313>, 2011.
- Zellweger, C., Klausen, J., and Buchmann, B.: System and performance audit for surface ozone, carbon monoxide and methane at the global GAW station Zugspitze-Schneefernerhaus Germany, June, 2006. Dübendorf, Switzerland: EMPA. WCC-Empa Report 06/4, <https://citeseerx.ist.psu.edu/document?repid=rep1&type=pdf&doi=49d2b76db4ad0b715ed94cb859feba895d81a4b1>, last accessed: 2024-02-1, 2020.
- 295 Zhou, S., Teng, F., and Tong, Q.: Mitigating sulfur hexafluoride (SF<sub>6</sub>) emission from electrical equipment in China, *Sustainability*, 10, 2402, <https://doi.org/10.3390/su10072402>, 2018.
